# Supplementary material
Source: publisher site journal article supplement (https://www.spandidos-publications.com/1110/downloadSupplementary)
Supplement: Supplementary file 1 [file downloadSupplementary]

## Sheet: RAS_NIR
Table SVII. shFLNB compared with Ctrl differential ASs (RAS).
ID	Chr	Ass1	Ass2	Strand	Mss1	Mss2	Type	Isoform	KorN	shCtrl_1st.Ratio	shCtrl_1st.Alt_average_sj	shCtrl_1st.Model_average_sj	shCtrl_1st.Alt_sj	shCtrl_1st.Model_sj	shCtrl_1st.isfiltered	shCtrl_2nd.Ratio	shCtrl_2nd.Alt_average_sj	shCtrl_2nd.Model_average_sj	shCtrl_2nd.Alt_sj	shCtrl_2nd.Model_sj	shCtrl_2nd.isfiltered	shFLNB_1st.Ratio	shFLNB_1st.Alt_average_sj	shFLNB_1st.Model_average_sj	shFLNB_1st.Alt_sj	shFLNB_1st.Model_sj	shFLNB_1st.isfiltered	shFLNB_2nd.Ratio	shFLNB_2nd.Alt_average_sj	shFLNB_2nd.Model_average_sj	shFLNB_2nd.Alt_sj	shFLNB_2nd.Model_sj	shFLNB_2nd.isfiltered	Pvalue	Tvalue	DiffType	Gene	Symbol	Chr	GeneType	Description
known_NIR_161	chr1	120833775;120834802	120834495;120836517	+	120833775	120836517	cassetteExon	ENST00000620612.4	known	0.73	98.5	37	194;3	37	y	0.76	74	24	144;4	24	y	0.6	105.5	69	205;6	69	y	0.57	144.5	110	279;10	110	y	0.0171278	-7.54247	down	ENSG00000273136.5	NBPF26	chr1	protein_coding	neuroblastoma breakpoint family, member 26
known_NIR_164	chr1	120834546	120837169	+	120836568	120837169	A5SS&ES	ENST00000619748.4	known	0.7	148	64	148	64	y	0.68	104	48	104	48	y	0.6	125	83	125	83	y	0.62	164	101	164	101	y	0.0298575	-5.65685	down	ENSG00000273136.5	NBPF26	chr1	protein_coding	neuroblastoma breakpoint family, member 26
known_NIR_206	chr1	145201301;145214731	145214677;145215639	-	145201301	145215639	cassetteExon	ENST00000616993.1	known	1	52.5	0	16;89	0	n	0.95	20.5	1	2;39	1	n	0.8	23.5	6	0;47	6	n	0.74	14	5	5;23	5	y	0.0368256	-5.24951	down	ENSG00000272419.5	RP11-403I13.8	chr1	processed_transcript		--
known_NIR_242	chr1	145975436	145977483	+	145977152	145977483	A5SS&ES	ENST00000625258.1	known	0.08	8	95	8	95	y	0.12	8	57	8	57	y	0.4	41	62	41	62	y	0.36	23	41	23	41	y	0.0100505	9.89949	up	ENSG00000280778.1	CH17-270A2.2	chr1	protein_coding		--
known_NIR_243	chr1	145975436;145977152	145977084;145977483	+	145975436	145977483	cassetteExon	ENST00000369313.7	known	0.92	90.5	8	86;95	8	y	0.87	54.5	8	52;57	8	y	0.55	51	41	40;62	41	y	0.62	37	23	33;41	23	y	0.0243444	-7.20735	down	ENSG00000121851.12	POLR3GL	chr1	protein_coding	polymerase (RNA) III (DNA directed) polypeptide G (32kD)-like
known_NIR_308	chr1	148575811	148576410	-	148575811	148577983	A5SS	ENST00000621070.4	known	0.86	199	32	199	32	y	0.88	235	31	235	31	y	0.94	405	27	405	27	y	0.95	574	32	574	32	y	0.0445338	6.7082	up	ENSG00000270629.5	NBPF14	chr1	protein_coding	neuroblastoma breakpoint family, member 14
known_NIR_485	chr1	153962747	153963495	-	153962747	153963177	5pMXE	ENST00000621013.4	known	0.72	381	147	381	147	y	0.7	315	132	315	132	y	0.64	369	210	369	210	y	0.63	339	198	339	198	y	0.0445338	-6.7082	down	ENSG00000143570.17	SLC39A1	chr1	protein_coding	solute carrier family 39 (zinc transporter), member 1
known_NIR_753	chr1	164812149	164821537	+	164812149;164820184	164820072;164821537	ES	ENST00000420696.6	known	0.62	19	11.5	19	16;7	y	0.58	16	11.5	16	10;13	y	0.81	46	10.5	46	10;11	y	0.75	49	16.5	49	7;26	y	0.049697	4.9923	up	ENSG00000185630.18	PBX1	chr1	protein_coding	pre-B-cell leukemia homeobox 1
known_NIR_933	chr1	207767195	207770321	+	207767195;207767823	207767779;207770321	ES	ENST00000354848.5	known	0.7	312	136.5	312	137;136	y	0.71	294	122.5	294	113;132	y	0.61	411	266.5	411	281;252	y	0.59	486	334.5	486	339;330	y	0.0273751	-9.39149	down	ENSG00000117335.18	CD46	chr1	protein_coding	CD46 molecule, complement regulatory protein
known_NIR_969	chr1	213008466	213015613	-	213008466	213013093	5pMXE	ENST00000621746.1	known	0.2	3	12	3	12	y	0.17	10	49	10	49	y	0	0	14	0	14	n	0.03	2	70	2	70	y	0.0152164	-8.01388	down	ENSG00000174606.12	ANGEL2	chr1	protein_coding	angel homolog 2 (Drosophila)
known_NIR_970	chr1	213008466	213015613	-	213008466;213013418	213013093;213015613	ES	ENST00000366962.7	known	0.16	3	16	3	12;20	y	0.21	10	37.5	10	49;26	y	0	0	20.5	0	14;27	n	0.04	2	46	2	70;22	y	0.0392905	-5.15373	down	ENSG00000174606.12	ANGEL2	chr1	protein_coding	angel homolog 2 (Drosophila)
known_NIR_986	chr1	217610192	217610321	-	217514889	217610321	A3SS	ENST00000366935.7	known	0.93	27	2	27	2	y	0.97	61	2	61	2	y	0.71	46	19	46	19	y	0.67	52	26	52	26	y	0.0116283	-9.19239	down	ENSG00000092978.10	GPATCH2	chr1	protein_coding	G patch domain containing 2
known_NIR_1035	chr1	228108318	228108955	-	228108318	228108437	5pMXE	ENST00000366732.5	known	0.8	170	43	170	43	y	0.78	248	70	248	70	y	0.87	132	19	132	19	y	0.85	147	25	147	25	y	0.0384761	4.94975	up	ENSG00000162910.18	MRPL55	chr1	protein_coding	mitochondrial ribosomal protein L55
known_NIR_1112	chr1	23799436	23800387	-	23799436	23800712	A5SS	ENST00000617979.4	known	0.31	100	224	100	224	y	0.25	86	265	86	265	y	0.11	20	166	20	166	y	0.04	10	225	10	225	y	0.0490518	-4.44707	down	ENSG00000117308.14	GALE	chr1	protein_coding	UDP-galactose-4-epimerase
known_NIR_1114	chr1	23814338	23816675	-	23808323	23816675	A3SS	ENST00000436439.6	known	0.9	116	13	116	13	y	0.91	93	9	93	9	y	0.86	119	19	119	19	y	0.85	39	7	39	7	y	0.0194193	-7.07107	down	ENSG00000117305.14	HMGCL	chr1	protein_coding	3-hydroxymethyl-3-methylglutaryl-CoA lyase
known_NIR_2047	chr10	73817554;73819645	73819532;73821682	-	73817554	73821682	cassetteExon	ENST00000351293.7	known	0.02	4	188	8;0	188	n	0.05	7.5	159	7;8	159	y	0.14	19.5	115	14;25	115	y	0.16	23	124	15;31	124	y	0.0329611	6.37905	up	ENSG00000148660.20	CAMK2G	chr10	protein_coding	calcium/calmodulin-dependent protein kinase II gamma
known_NIR_2063	chr10	78037304	78040204	+	78037304	78040201	A3SS	ENST00000435275.5	known	0.53	105	92	105	92	y	0.51	79	76	79	76	y	0.69	229	102	229	102	y	0.66	142	74	142	74	y	0.0198301	8.59785	up	ENSG00000138326.18	RPS24	chr10	protein_coding	ribosomal protein S24
known_NIR_2123	chr10	97750470	97751376	+	97750470	97751391	A3SS	ENST00000337540.11	known	0.61	60	39	60	39	y	0.59	66	46	66	46	y	0.42	69	95	69	95	y	0.4	55	83	55	83	y	0.00549455	-13.435	down	ENSG00000155256.17	ZFYVE27	chr10	protein_coding	zinc finger, FYVE domain containing 27
known_NIR_2125	chr10	98162975	98163293	+	98134706	98163293	A5SS	ENST00000370584.7	known	0.33	3	6	3	6	n	0.32	6	13	6	13	y	1	20	0	20	0	n	0.95	18	1	18	1	n	0.0196082	25.4951	up	ENSG00000166024.13	R3HCC1L	chr10	protein_coding	R3H domain and coiled-coil containing 1-like
known_NIR_2212	chr11	119085066	119088635	+	119085066;119088308	119088255;119088635	ES	ENST00000278715.7	known	0.11	48	385.5	48	410;361	y	0.12	50	384.5	50	382;387	y	0.16	74	391.5	74	402;381	y	0.15	53	292	53	317;267	y	0.0298575	5.65685	up	ENSG00000256269.6	HMBS	chr11	protein_coding	hydroxymethylbilane synthase
known_NIR_2213	chr11	119085066	119088635	+	119088308	119088635	A5SS&ES	ENST00000537841.5	known	0.12	48	361	48	361	y	0.11	50	387	50	387	y	0.16	74	381	74	381	y	0.17	53	267	53	267	y	0.0194193	7.07107	up	ENSG00000256269.6	HMBS	chr11	protein_coding	hydroxymethylbilane synthase
known_NIR_2220	chr11	119113712	119113855	+	119113712	119113852	A3SS	ENST00000336702.7	known	1	51	0	51	0	n	0.96	47	2	47	2	y	0.82	40	9	40	9	y	0.85	40	7	40	7	y	0.033757	-5.8	down	ENSG00000172375.12	C2CD2L	chr11	protein_coding	C2CD2-like
known_NIR_2235	chr11	120407823;120409450	120409394;120420753	+	120407823	120420753	cassetteExon	ENST00000356641.7	known	0.57	8	6	10;6	6	y	0.54	27.5	23	21;34	23	y	0.25	14.5	44	18;11	44	y	0.23	16.5	55	21;12	55	y	0.0058295	-17.4731	down	ENSG00000196914.8	ARHGEF12	chr11	protein_coding	Rho guanine nucleotide exchange factor (GEF) 12
known_NIR_2328	chr11	1445907;1447863	1447798;1449776	+	1445907	1449776	cassetteExon	ENST00000308219.13	known	0.49	24.5	25	32;17	25	y	0.38	11	18	5;17	18	y	1	31	0	23;39	0	n	0.92	33	3	33;33	3	y	0.0210288	7.71975	up	ENSG00000174672.15	BRSK2	chr11	protein_coding	BR serine/threonine kinase 2
known_NIR_2399	chr11	2902718	2903214	+	2902364	2903214	A5SS	ENST00000312221.9	known	0.05	5	97	5	97	y	0	0	55	0	55	n	0.2	13	52	13	52	y	0.26	20	57	20	57	y	0.0368256	5.24951	up	ENSG00000110628.13	SLC22A18	chr11	protein_coding	solute carrier family 22, member 18
known_NIR_2487	chr11	3808651	3823883	+	3808315	3823883	A5SS	ENST00000396993.8	known	0.73	8	3	8	3	y	0.79	15	4	15	4	y	0.5	8	8	8	8	y	0.53	17	15	17	15	y	0.0393945	-7.30449	down	ENSG00000148985.19	PGAP2	chr11	protein_coding	post-GPI attachment to proteins 2
known_NIR_2553	chr11	47295576	47295897	+	47295567	47295897	A5SS	ENST00000395344.7	known	0.82	103	22	103	22	y	0.88	35	5	35	5	y	0.62	54	33	54	33	y	0.68	98	47	98	47	y	0.0421737	-4.71405	down	ENSG00000110514.18	MADD	chr11	protein_coding	MAP-kinase activating death domain
known_NIR_2571	chr11	48130716	48131511	+	48130716	48136039	A3SS	ENST00000613246.4	known	0.46	21	25	21	25	y	0.38	11	18	11	18	y	0.06	4	61	4	61	y	0.1	8	76	8	76	y	0.037184	-7.60263	down	ENSG00000149177.12	PTPRJ	chr11	protein_coding	protein tyrosine phosphatase, receptor type, J
known_NIR_2576	chr11	502181	506609	-	504996	506609	A3SS&ES	ENST00000397615.6	known	0.25	42	129	42	129	y	0.21	49	184	49	184	y	0.46	72	85	72	85	y	0.48	120	129	120	129	y	0.0225398	10.7331	up	ENSG00000023191.16	RNH1	chr11	protein_coding	ribonuclease/angiogenin inhibitor 1
known_NIR_2725	chr11	62854551	62855133	-	62854551;62854938	62854888;62855133	ES	ENST00000539921.5	known	0.31	105	231	105	237;225	y	0.33	181	374.5	181	327;422	y	0.14	92	555.5	92	557;554	y	0.18	105	485.5	105	452;519	y	0.0405833	-7.15542	down	ENSG00000255717.6	SNHG1	chr11	processed_transcript	small nucleolar RNA host gene 1
known_NIR_2934	chr11	67289550;67289965	67289829;67290078	+	67289550	67290078	cassetteExon	ENST00000447274.6	known	0	0	14	0;0	14	n	0.04	2	54	0;4	54	n	0.29	2	5	0;4	5	n	0.23	3.5	12	5;2	12	y	0.0306714	6.6564	up	ENSG00000172932.14	ANKRD13D	chr11	protein_coding	ankyrin repeat domain 13 family, member D
known_NIR_2979	chr11	68583129	68587945	+	68583129	68587927	A3SS	ENST00000393800.6	known	0.32	18	39	18	39	y	0.36	21	37	21	37	y	0.13	11	76	11	76	y	0.1	11	98	11	98	y	0.0152674	-9	down	ENSG00000110075.14	PPP6R3	chr11	protein_coding	protein phosphatase 6, regulatory subunit 3
known_NIR_3102	chr11	77842628	77872175	+	77842628	77869722	A3SS&ES	ENST00000532481.5	known	0.1	4	38	4	38	y	0.08	6	66	6	66	y	0	0	72	0	72	n	0.02	2	79	2	79	y	0.0298575	-5.65685	down	ENSG00000087884.14	AAMDC	chr11	protein_coding	adipogenesis associated, Mth938 domain containing
known_NIR_3191	chr11	8956298	8964209	-	8956298	8962092	A5SS&ES	ENST00000525069.5	known	0.21	23	88	23	88	y	0.27	29	77	29	77	y	0.07	6	79	6	79	y	0	0	60	0	60	n	0.0490518	-4.44707	down	ENSG00000175348.10	TMEM9B	chr11	protein_coding	TMEM9 domain family, member B
known_NIR_3283	chr12	105229223	105233091	-	105229223	105235959	A5SS	ENST00000258530.7	known	0.17	6	30	6	30	y	0.14	3	19	3	19	y	0	0	22	0	22	n	0.04	2	43	2	43	y	0.0383286	-5.4	down	ENSG00000136044.11	APPL2	chr12	protein_coding	adaptor protein, phosphotyrosine interaction, PH domain and leucine zipper containing 2
known_NIR_3382	chr12	114679651;114679972	114679913;114680879	-	114679651	114680879	cassetteExon	ENST00000349155.6	known	0.97	67.5	2	75;60	2	y	0.88	46	6	44;48	6	y	0.49	30	31	13;47	31	y	0.41	28	40	23;33	40	y	0.016315	-7.88932	down	ENSG00000135111.14	TBX3	chr12	protein_coding	T-box 3
known_NIR_3436	chr12	121888994;121894841	121894739;121903006	+	121888994	121903006	cassetteExon	ENST00000542602.1	known	0.91	239.5	25	473;6	25	y	0.89	225	28	441;9	28	y	0.99	178	2	353;3	2	y	0.98	243.5	6	487;0	6	n	0.037184	7.60263	up	ENSG00000110801.13	PSMD9	chr12	protein_coding	proteasome (prosome, macropain) 26S subunit, non-ATPase, 9
known_NIR_3438	chr12	121899845	121903006	+	121888994	121903006	A5SS	ENST00000542602.1	known	0.93	309	25	309	25	y	0.92	316	28	316	28	y	0.99	293	2	293	2	y	0.98	302	6	302	6	y	0.0136061	8.48528	up	ENSG00000110801.13	PSMD9	chr12	protein_coding	proteasome (prosome, macropain) 26S subunit, non-ATPase, 9
known_NIR_3561	chr12	22457161	22458484	-	22457161	22469709	A5SS	ENST00000333957.8	known	0	0	16	0	16	n	0.03	1	34	1	34	n	0.42	20	28	20	28	y	0.35	6	11	6	11	y	0.0322801	9.71668	up	ENSG00000111731.12	C2CD5	chr12	protein_coding	C2 calcium-dependent domain containing 5
known_NIR_3642	chr12	46243314	46268865	-	46243314	46254814	A5SS&ES	ENST00000439706.5	known	0.75	24	8	24	8	y	0.74	64	22	64	22	y	0.45	89	110	89	110	y	0.47	61	69	61	69	y	0.00635149	-25.4912	down	ENSG00000111371.15	SLC38A1	chr12	protein_coding	solute carrier family 38, member 1
known_NIR_3649	chr12	47079065;47079248	47079142;47079462	-	47079065	47079462	cassetteExon	ENST00000266581.4	known	0.63	12	7	8;16	7	y	0.58	11	8	13;9	8	y	0.1	3	26	5;1	26	n	0.09	2.5	25	1;4	25	n	0.0254701	-20.0038	down	ENSG00000139211.6	AMIGO2	chr12	protein_coding	adhesion molecule with Ig-like domain 2
known_NIR_3814	chr12	54183959	54188951	-	54183959	54187819	A5SS&ES	ENST00000513838.5	known	0.13	19	129	19	129	y	0.17	34	167	34	167	y	0.32	51	110	51	110	y	0.35	55	104	55	104	y	0.0217889	7.4	up	ENSG00000123415.14	SMUG1	chr12	protein_coding	single-strand-selective monofunctional uracil-DNA glycosylase 1
known_NIR_3862	chr12	55932255	55936423	+	55931344	55936423	A5SS	ENST00000331886.9	known	0.58	14	10	14	10	y	0.5	8	8	8	8	y	0.27	7	19	7	19	y	0.33	11	22	11	22	y	0.0471695	-4.8	down	ENSG00000065357.19	DGKA	chr12	protein_coding	diacylglycerol kinase, alpha 80kDa
known_NIR_4421	chr14	105368539	105369841	+	105368515	105369841	A5SS	ENST00000430725.6	known	0.77	74	22	74	22	y	0.72	54	21	54	21	y	1	58	0	58	0	n	0.97	66	2	66	2	y	0.0252224	8.23193	up	ENSG00000179364.13	PACS2	chr14	protein_coding	phosphofurin acidic cluster sorting protein 2
known_NIR_4624	chr14	55148473	55150799	-	55148473;55148684	55148594;55150799	ES	ENST00000395425.6	known	1	21	0	21	0;0	n	0.93	66	5	66	5;5	y	0.7	73	31	73	30;32	y	0.66	84	44	84	52;36	y	0.0345096	-7.06998	down	ENSG00000126787.12	DLGAP5	chr14	protein_coding	discs, large (Drosophila) homolog-associated protein 5
known_NIR_4660	chr14	64488057	64490361	-	64449638	64490361	A3SS	ENST00000555220.5	known	0.12	1	7	1	7	n	0	0	18	0	18	n	0.86	65	11	65	11	y	0.65	55	30	55	30	y	0.0475438	5.74694	up	ENSG00000089775.11	ZBTB25	chr14	protein_coding	zinc finger and BTB domain containing 25
known_NIR_4742	chr14	73297285;73316422	73316390;73323130	-	73297285	73323130	cassetteExon	ENST00000554546.5	known	0.34	67.5	129	70;65	129	y	0.33	26.5	54	31;22	54	y	0.5	76.5	76	83;70	76	y	0.53	112	101	115;109	101	y	0.0345951	11.3842	up	ENSG00000133961.19	NUMB	chr14	protein_coding	numb homolog (Drosophila)
known_NIR_5110	chr15	66505391;66508892	66508746;66513988	+	66505391	66513988	cassetteExon	ENST00000535141.6	known	0.9	52	6	0;104	6	n	0.92	109	10	0;218	10	n	0.99	134.5	2	45;224	2	y	1	119	0	5;233	0	n	0.037184	7.60263	up	ENSG00000174442.11	ZWILCH	chr15	protein_coding	zwilch kinetochore protein
known_NIR_5111	chr15	66505391;66508892	66508841;66513988	+	66505391	66513988	cassetteExon	ENST00000535141.6	known	0.94	97	6	90;104	6	y	0.95	183.5	10	149;218	10	y	0.99	179	2	134;224	2	y	1	196.5	0	160;233	0	n	0.0194193	7.07107	up	ENSG00000174442.11	ZWILCH	chr15	protein_coding	zwilch kinetochore protein
known_NIR_5114	chr15	67703408	67748231	+	67703408;67727945	67727916;67748231	ES	ENST00000178640.9	known	0.67	7	3.5	7	5;2	y	0.55	6	5	6	5;5	y	0.12	3	23	3	20;26	y	0.03	2	56	2	45;67	y	0.0232836	-7.13333	down	ENSG00000137764.19	MAP2K5	chr15	protein_coding	mitogen-activated protein kinase kinase 5
known_NIR_5139	chr15	72219110	72230896	-	72219110	72230900	A5SS	ENST00000319622.10	known	0.55	250	208	250	208	y	0.53	226	198	226	198	y	0.45	163	197	163	197	y	0.42	244	340	244	340	y	0.0384207	-5.82435	down	ENSG00000067225.17	PKM	chr15	protein_coding	pyruvate kinase, muscle
known_NIR_5289	chr15	85089416	85097948	+	85089416;85091181	85091044;85097948	ES	ENST00000310298.8	known	0.22	10	36	10	52;20	y	0.19	7	30.5	7	27;34	y	0	0	29	0	37;21	n	0.03	2	69.5	2	63;76	y	0.012237	-8.95669	down	ENSG00000073417.14	PDE8A	chr15	protein_coding	phosphodiesterase 8A
known_NIR_5337	chr15	96332621	96334076	+	96326352	96334076	A5SS	ENST00000421109.6	known	0.52	13	12	13	12	y	0.38	3	5	3	5	n	0.89	17	2	17	2	y	1	3	0	3	0	n	0.0347761	5.56039	up	ENSG00000185551.12	NR2F2	chr15	protein_coding	nuclear receptor subfamily 2, group F, member 2
known_NIR_5490	chr16	20900535;20902717	20902486;20915556	+	20900535	20915556	cassetteExon	ENST00000568663.5	known	0.45	28.5	35	26;31	35	y	0.43	10	13	0;20	13	n	0.23	3	10	0;6	10	n	0.27	16	44	2;30	44	y	0.0316556	-8.49706	down	ENSG00000102897.9	LYRM1	chr16	protein_coding	LYR motif containing 1
known_NIR_5612	chr16	29820510	29830515	+	29820510	29830474	A3SS	ENST00000395353.5	known	0.86	145	24	145	24	y	0.84	81	15	81	15	y	0.76	120	38	120	38	y	0.78	123	35	123	35	y	0.0298575	-5.65685	down	ENSG00000013364.18	MVP	chr16	protein_coding	major vault protein
known_NIR_5711	chr16	30928499	30930073	+	30928628	30930073	A5SS	ENST00000338343.8	known	0.58	38	27	38	27	y	0.62	68	41	68	41	y	0.86	69	11	69	11	y	0.79	131	35	131	35	y	0.0497243	5.58156	up	ENSG00000099364.16	FBXL19	chr16	protein_coding	F-box and leucine-rich repeat protein 19
known_NIR_5794	chr16	4496266	4505484	+	4476487	4505484	A5SS	ENST00000570646.5	known	0.15	57	312	57	312	y	0.17	59	286	59	286	y	0.24	88	275	88	275	y	0.23	60	200	60	200	y	0.0445338	6.7082	up	ENSG00000103415.11	HMOX2	chr16	protein_coding	heme oxygenase 2
known_NIR_5814	chr16	4683932;4686303	4686259;4688796	+	4683932	4688796	cassetteExon	ENST00000262370.11	known	0.04	8	205	5;11	205	y	0.02	3	129	2;4	129	y	0.11	16	127	10;22	127	y	0.09	20.5	209	19;22	209	y	0.0384761	4.94975	up	ENSG00000102858.12	MGRN1	chr16	protein_coding	mahogunin ring finger 1, E3 ubiquitin protein ligase
known_NIR_5990	chr16	69120649	69121436	-	69120649;69121170	69121053;69121436	ES	ENST00000448552.6	known	0.6	218	142.5	218	141;144	y	0.63	228	136.5	228	128;145	y	0.49	132	138.5	132	129;148	y	0.51	203	192.5	203	199;186	y	0.0329611	-6.37905	down	ENSG00000168802.12	CHTF8	chr16	protein_coding	CTF8, chromosome transmission fidelity factor 8 homolog (S. cerevisiae)
known_NIR_6317	chr17	20452392	20453017	-	20452395	20453017	A3SS	ENST00000423676.7	known	0.44	21	27	21	27	y	0.45	19	23	19	23	y	0.29	16	39	16	39	y	0.31	29	65	29	65	y	0.0170999	-12.9692	down	ENSG00000170298.15	LGALS9B	chr17	protein_coding	lectin, galactoside-binding, soluble, 9B
known_NIR_6348	chr17	28717425	28718122	-	28717291	28718122	A3SS	ENST00000453384.7	known	0.58	89	65	89	65	y	0.62	83	51	83	51	y	0.76	70	22	70	22	y	0.81	109	25	109	25	y	0.0318977	5.77843	up	ENSG00000109113.17	RAB34	chr17	protein_coding	RAB34, member RAS oncogene family
known_NIR_6475	chr17	39738392	39742252	+	39738133	39742252	A5SS	ENST00000309156.8	known	0.25	16	49	16	49	y	0.2	20	81	20	81	y	0	0	58	0	58	n	0.05	4	78	4	78	y	0.0298575	-5.65685	down	ENSG00000141738.13	GRB7	chr17	protein_coding	growth factor receptor-bound protein 7
known_NIR_6539	chr17	42823879	42824155	-	42823879	42824133	A5SS	ENST00000361523.8	known	0.57	97	72	97	72	y	0.52	85	79	85	79	y	0.34	77	148	77	148	y	0.32	38	80	38	80	y	0.0452056	-7.9849	down	ENSG00000126581.12	BECN1	chr17	protein_coding	beclin 1, autophagy related
known_NIR_6586	chr17	44189299	44190501	+	44189299;44189588	44189411;44190501	ES	ENST00000446571.7	known	0	0	58	0	4;112	n	0.07	4	50.5	4	0;101	n	0.36	28	49	28	5;93	y	0.45	40	48.5	40	0;97	n	0.0265127	6.49023	up	ENSG00000168591.15	TMUB2	chr17	protein_coding	transmembrane and ubiquitin-like domain containing 2
known_NIR_6587	chr17	44189299	44190501	+	44189588	44190501	A5SS	ENST00000357984.7	known	0	0	112	0	112	n	0.04	4	101	4	101	y	0.23	28	93	28	93	y	0.29	40	97	40	97	y	0.0306714	6.6564	up	ENSG00000168591.15	TMUB2	chr17	protein_coding	transmembrane and ubiquitin-like domain containing 2
known_NIR_6596	chr17	44218296	44221201	-	44218296	44220740	5pMXE	ENST00000343638.9	known	0.38	27	44	27	44	y	0.43	32	42	32	42	y	0.19	16	68	16	68	y	0.12	10	72	10	72	y	0.0355011	-5.81238	down	ENSG00000108312.14	UBTF	chr17	protein_coding	upstream binding transcription factor, RNA polymerase I
known_NIR_6790	chr17	63685578	63688527	+	63685590	63688527	A5SS	ENST00000579585.5	known	0.7	26	11	26	11	y	0.66	44	23	44	23	y	0.42	28	39	28	39	y	0.39	26	41	26	41	y	0.0105768	-11	down	ENSG00000198909.7	MAP3K3	chr17	protein_coding	mitogen-activated protein kinase kinase kinase 3
known_NIR_6993	chr17	76683927	76685072	-	76677702	76685072	A3SS	ENST00000355797.7	known	0.46	40	47	40	47	y	0.48	39	42	39	42	y	0.36	38	67	38	67	y	0.37	36	62	36	62	y	0.0273751	-9.39149	down	ENSG00000182534.13	MXRA7	chr17	protein_coding	matrix-remodelling associated 7
known_NIR_7167	chr17	82113765	82127692	-	82101866	82127692	A3SS	ENST00000389641.8	known	0.14	4	25	4	25	y	0.12	6	44	6	44	y	0.04	2	53	2	53	y	0.05	2	40	2	40	y	0.037184	-7.60263	down	ENSG00000176155.18	CCDC57	chr17	protein_coding	coiled-coil domain containing 57
known_NIR_7433	chr19	10830378	10830978	+	10830378	10830981	A3SS	ENST00000585892.5	known	0.77	231	68	231	68	y	0.75	149	50	149	50	y	0.83	146	30	146	30	y	0.84	129	24	129	24	y	0.0445338	6.7082	up	ENSG00000079805.16	DNM2	chr19	protein_coding	dynamin 2
known_NIR_7602	chr19	16530913	16532598	-	16530880	16532598	A3SS	ENST00000546361.6	known	0.15	20	112	20	112	y	0.2	11	45	11	45	y	0	0	73	0	73	n	0.04	5	115	5	115	y	0.0439884	-4.84139	down	ENSG00000085872.14	CHERP	chr19	protein_coding	calcium homeostasis endoplasmic reticulum protein
known_NIR_7825	chr19	35269699	35270759	+	35269699	35270447	A3SS&ES	ENST00000343550.9	known	0.02	2	88	2	88	y	0	0	86	0	86	n	0.25	16	48	16	48	y	0.22	18	63	18	63	y	0.0104404	12.4808	up	ENSG00000105698.15	USF2	chr19	protein_coding	upstream transcription factor 2, c-fos interacting
known_NIR_7830	chr19	35497538;35497681	35497647;35498716	-	35497538	35498716	cassetteExon	ENST00000408915.6	known	0.12	16.5	116	13;20	116	y	0.11	10.5	84	12;9	84	y	0.01	0.5	37	1;0	37	n	0	0	32	0;0	32	n	0.00410679	-15.5563	down	ENSG00000161249.20	DMKN	chr19	protein_coding	dermokine
known_NIR_7839	chr19	35505986;35508240	35508205;35509911	-	35505986	35509911	cassetteExon	ENST00000402589.6	known	0.32	23.5	49	26;21	49	y	0.3	28.5	68	41;16	68	y	0.16	7.5	39	7;8	39	y	0.14	6.5	39	11;2	39	y	0.00772212	-11.3137	down	ENSG00000161249.20	DMKN	chr19	protein_coding	dermokine
known_NIR_7968	chr19	40365930	40366419	+	40365930	40366384	A3SS	ENST00000409587.5	known	0.87	232	36	232	36	y	0.89	178	22	178	22	y	0.96	186	8	186	8	y	0.95	292	15	292	15	y	0.0445338	6.7082	up	ENSG00000105223.18	PLD3	chr19	protein_coding	phospholipase D family, member 3
known_NIR_8078	chr19	45165194	45178135	-	45165194	45178093	A5SS	ENST00000006275.8	known	0.35	30	55	30	55	y	0.37	41	69	41	69	y	0.44	27	35	27	35	y	0.42	47	64	47	64	y	0.0384761	4.94975	up	ENSG00000007255.10	TRAPPC6A	chr19	protein_coding	trafficking protein particle complex 6A
known_NIR_8092	chr19	45495214	45496792	-	45495139	45496792	A3SS	ENST00000245923.8	known	0.43	13	17	13	17	y	0.53	9	8	9	8	y	0	0	24	0	24	n	0.1	6	53	6	53	y	0.025992	-6.08112	down	ENSG00000125744.11	RTN2	chr19	protein_coding	reticulon 2
known_NIR_8405	chr19	58571429	58573373	-	58571429	58573055	5pMXE	ENST00000594234.5	known	0.43	30	40	30	40	y	0.38	6	10	6	10	y	0.89	40	5	40	5	y	0.85	23	4	23	4	y	0.00568062	14.5242	up	ENSG00000099326.8	MZF1	chr19	protein_coding	myeloid zinc finger 1
known_NIR_8435	chr19	7904068;7905855	7905808;7909755	+	7904068	7909755	cassetteExon	ENST00000397981.7	known	0.46	68	80	68;68	80	y	0.41	41	60	46;36	60	y	0.22	38	135	39;37	135	y	0.28	53.5	135	51;56	135	y	0.0444442	-4.73736	down	ENSG00000076984.17	MAP2K7	chr19	protein_coding	mitogen-activated protein kinase kinase 7
known_NIR_8534	chr2	111314562	111344061	-	111239996	111344061	A3SS	ENST00000431385.5	known	0	0	8	0	8	n	0.19	6	26	6	26	y	1	2	0	2	0	n	0.8	24	6	24	6	y	0.0282968	5.83625	up	ENSG00000172965.14	MIR4435-2HG	chr2	lincRNA	MIR4435-2 host gene
known_NIR_8749	chr2	191400468	191402632	+	191400468;191400835	191400749;191402632	ES	ENST00000392318.7	known	0.53	51	46	51	66;26	y	0.49	43	45.5	43	51;40	y	0.34	54	104.5	54	125;84	y	0.36	53	93	53	93;93	y	0.0405833	-7.15542	down	ENSG00000128641.17	MYO1B	chr2	protein_coding	myosin IB
known_NIR_8882	chr2	218659743;218660245	218660037;218660939	+	218659743	218660939	cassetteExon	ENST00000359273.7	known	0.37	19	32	21;17	32	y	0.4	18.5	28	15;22	28	y	0.23	33.5	114	25;42	114	y	0.19	8	35	10;6	35	y	0.0240904	-7	down	ENSG00000074582.12	BCS1L	chr2	protein_coding	BC1 (ubiquinol-cytochrome c reductase) synthesis-like
known_NIR_9205	chr2	54987698	55025086	-	54987698	55028164	A5SS	ENST00000357732.8	known	0.76	45	14	45	14	y	0.75	6	2	6	2	n	0.62	28	17	28	17	y	0.61	33	21	33	21	y	0.0025413	-19.799	down	ENSG00000115310.17	RTN4	chr2	protein_coding	reticulon 4
known_NIR_9297	chr2	71380565	71388623	+	71380565	71396141	A3SS	ENST00000264447.8	known	0.11	2	16	2	16	y	0.07	2	26	2	26	y	0.42	11	15	11	15	y	0.45	14	17	14	17	y	0.00697187	13.8	up	ENSG00000075292.18	ZNF638	chr2	protein_coding	zinc finger protein 638
known_NIR_9358	chr2	86529397	86563304	-	86529397	86542252	A5SS&ES	ENST00000439940.6	known	0.07	29	369	29	369	y	0.08	25	304	25	304	y	0.12	53	388	53	388	y	0.11	49	393	49	393	y	0.0298575	5.65685	up	ENSG00000115561.14	CHMP3	chr2	protein_coding	charged multivesicular body protein 3
known_NIR_9595	chr20	38421098;38426052	38425935;38426419	-	38421098	38426419	cassetteExon	ENST00000423536.5	known	0.5	26.5	26	27;26	26	y	0.56	31.5	25	51;12	25	y	0.28	12.5	32	23;2	32	y	0.35	13	24	18;8	24	y	0.0449627	-4.664	down	ENSG00000196756.11	SNHG17	chr20	processed_transcript	small nucleolar RNA host gene 17
known_NIR_9714	chr20	50096820;50098981	50098882;50113107	-	50096820	50113107	cassetteExon	ENST00000371657.9	known	0.04	23	519	29;17	519	y	0.05	23	441	35;11	441	y	0	0	613	0;0	613	n	0.01	6	598	10;2	598	y	0.0298575	-5.65685	down	ENSG00000244687.11	UBE2V1	chr20	protein_coding	ubiquitin-conjugating enzyme E2 variant 1
known_NIR_9848	chr21	25729801	25735487	-	25729801	25734853	5pMXE	ENST00000284971.7	known	0.13	87	602	87	602	y	0.12	122	890	122	890	y	0.05	37	725	37	725	y	0.06	40	633	40	633	y	0.0100505	-9.89949	down	ENSG00000154723.12	ATP5J	chr21	protein_coding	ATP synthase, H+ transporting, mitochondrial Fo complex, subunit F6
known_NIR_9873	chr21	32602367	32603161	-	32582415	32603161	A3SS	ENST00000553001.1	known	0.99	491	3	491	3	y	1	562	1	562	1	n	0.96	504	19	504	19	y	0.95	429	23	429	23	y	0.0298575	-5.65685	down	ENSG00000265590.9	AP000275.65	chr21	protein_coding		--
known_NIR_9929	chr21	41246063;41257326	41257158;41275371	+	41246063;41250901	41250752;41275371	MXE	ENST00000328735.10	known	0.35	349	640.5	0;698	1243;38	n	0.36	314	550	0;628	999;101	n	0.42	511	701	16;1006	1332;70	y	0.41	523.5	759	20;1027	1456;62	y	0.0136061	8.48528	up	ENSG00000182240.15	BACE2	chr21	protein_coding	beta-site APP-cleaving enzyme 2
known_NIR_10055	chr22	17739488	17774381	-	17739488;17750174	17750105;17774381	ES	ENST00000614949.4	known	0.32	48	100	48	26;174	y	0.37	79	134.5	79	27;242	y	0.1	12	112	12	22;202	y	0.17	29	145	29	32;258	y	0.0479901	-4.8824	down	ENSG00000015475.18	BID	chr22	protein_coding	BH3 interacting domain death agonist
known_NIR_10165	chr22	27853663	27858387	-	27853663;27854939	27854854;27858387	ES	ENST00000335272.9	known	0.05	9	156	9	165;147	y	0.04	9	204.5	9	185;224	y	0	0	243	0	220;266	n	0.01	2	259.5	2	254;265	y	0.0298575	-5.65685	down	ENSG00000180957.17	PITPNB	chr22	protein_coding	phosphatidylinositol transfer protein, beta
known_NIR_10179	chr22	29288786	29291565	+	29288786	29291562	A3SS	ENST00000397938.6	known	0.5	258	261	258	261	y	0.52	143	132	143	132	y	0.7	228	100	228	100	y	0.67	233	114	233	114	y	0.016102	9.70725	up	ENSG00000182944.17	EWSR1	chr22	protein_coding	EWS RNA-binding protein 1
known_NIR_10359	chr22	49787887	49794034	-	49787494	49794034	A3SS	ENST00000216267.12	known	0.16	6	32	6	32	y	0	0	24	0	24	n	0.75	40	13	40	13	y	0.68	19	9	19	9	y	0.0465102	7.272	up	ENSG00000100425.18	BRD1	chr22	protein_coding	bromodomain containing 1
known_NIR_10366	chr22	50256646;50256964	50256935;50257082	-	50256646	50257082	cassetteExon	ENST00000395780.5	known	0.8	24.5	6	19;30	6	y	0.75	29.5	10	24;35	10	y	1	74.5	0	85;64	0	n	0.98	55.5	1	45;66	1	n	0.0452056	7.9849	up	ENSG00000188130.13	MAPK12	chr22	protein_coding	mitogen-activated protein kinase 12
known_NIR_10376	chr22	50456673	50459255	-	50456673;50457111	50457034;50459255	ES	ENST00000380817.7	known	0.68	60	28	60	33;23	y	0.69	68	30.5	68	22;39	y	0.78	35	10	35	6;14	y	0.8	92	23	92	19;27	y	0.0273751	9.39149	up	ENSG00000100241.20	SBF1	chr22	protein_coding	SET binding factor 1
known_NIR_10604	chr3	138187599	138221926	+	138187599;138188530	138188455;138221926	ES	ENST00000491704.5	known	0.53	16	14	16	17;11	y	0.57	10	7.5	10	15;0	n	0.21	7	27	7	29;25	y	0.13	4	26.5	4	41;12	y	0.0316556	-8.49706	down	ENSG00000114098.17	ARMC8	chr3	protein_coding	armadillo repeat containing 8
known_NIR_10735	chr3	169773462;169774097	169774031;169774265	+	169773462	169774265	cassetteExon	ENST00000349841.9	known	1	22.5	0	21;24	0	n	0.87	13	2	6;20	2	y	0.41	7	10	7;7	10	y	0.35	23.5	43	20;27	43	y	0.0400578	-7.75258	down	ENSG00000085274.15	MYNN	chr3	protein_coding	myoneurin
known_NIR_10792	chr3	184314674	184315763	+	184314674	184317717	A3SS	ENST00000350481.9	known	0.15	18	105	18	105	y	0.14	10	63	10	63	y	0.2	13	51	13	51	y	0.19	20	84	20	84	y	0.0194193	7.07107	up	ENSG00000114867.19	EIF4G1	chr3	protein_coding	eukaryotic translation initiation factor 4 gamma, 1
known_NIR_10921	chr3	33632371	33644757	-	33632374	33644757	A3SS	ENST00000468888.6	known	0.43	3	4	3	4	n	0.54	21	18	21	18	y	0.88	14	2	14	2	y	0.79	31	8	31	8	y	0.0419318	4.92518	up	ENSG00000163539.15	CLASP2	chr3	protein_coding	cytoplasmic linker associated protein 2
known_NIR_11040	chr3	48627055	48627946	-	48627052	48627946	A3SS	ENST00000420764.6	known	0.37	84	142	84	142	y	0.36	87	152	87	152	y	0.46	92	109	92	109	y	0.48	100	109	100	109	y	0.0273751	9.39149	up	ENSG00000225697.10	SLC26A6	chr3	protein_coding	solute carrier family 26 (anion exchanger), member 6
known_NIR_11152	chr3	51671288	51674271	+	51672301	51674271	A5SS	ENST00000415259.5	known	0.85	73	13	73	13	y	0.81	48	11	48	11	y	0.57	20	15	20	15	y	0.59	29	20	29	20	y	0.0212375	-11.1803	down	ENSG00000164081.12	TEX264	chr3	protein_coding	testis expressed 264
known_NIR_11153	chr3	51671288;51672301	51672210;51674271	+	51671288	51674271	cassetteExon	ENST00000614067.4	known	0.08	6.5	73	0;13	73	n	0.1	5.5	48	0;11	48	n	0.33	10	20	5;15	20	y	0.28	11.5	29	3;20	29	y	0.0452056	7.9849	up	ENSG00000164081.12	TEX264	chr3	protein_coding	testis expressed 264
known_NIR_11155	chr3	51671288;51672392	51672210;51674271	+	51671288	51674271	cassetteExon	ENST00000614067.4	known	0.07	5.5	73	0;11	73	n	0.06	3	48	0;6	48	n	0.2	5	20	5;5	20	y	0.21	7.5	29	3;12	29	y	0.0025413	19.799	up	ENSG00000164081.12	TEX264	chr3	protein_coding	testis expressed 264
known_NIR_11196	chr3	52246812	52247682	+	52246812;52247228	52246974;52247682	ES	ENST00000323588.8	known	0.4	6	9	6	16;2	y	0.42	7	9.5	7	7;12	y	0.32	3	6.5	3	7;6	y	0.34	9	17.5	9	8;27	y	0.0298575	-5.65685	down	ENSG00000164088.17	PPM1M	chr3	protein_coding	protein phosphatase, Mg2+/Mn2+ dependent, 1M
known_NIR_11207	chr3	52554879;52558413	52558249;52561767	-	52554879	52561767	cassetteExon	ENST00000356770.8	known	0	0	22	0;0	22	n	0.06	1	15	0;2	15	n	0.44	14	18	12;16	18	y	0.56	7.5	6	5;10	6	y	0.0418331	7.00635	up	ENSG00000163939.18	PBRM1	chr3	protein_coding	polybromo 1
known_NIR_11233	chr3	57896371	57896511	+	57890100	57896511	A5SS	ENST00000295951.7	known	0.15	11	60	11	60	y	0.16	6	32	6	32	y	0.03	2	56	2	56	y	0.01	1	82	1	82	n	0.0189814	-12.0748	down	ENSG00000163681.14	SLMAP	chr3	protein_coding	sarcolemma associated protein
known_NIR_11287	chr3	9697866	9701790	+	9689082	9701790	A5SS	ENST00000420925.5	known	0.38	25	41	25	41	y	0.33	10	20	10	20	y	0.69	18	8	18	8	y	0.64	32	18	32	18	y	0.0127589	8.76812	up	ENSG00000163719.18	MTMR14	chr3	protein_coding	myotubularin related protein 14
known_NIR_11474	chr4	1700070	1711874	-	1700070;1703700	1703596;1711874	ES	ENST00000489418.5	known	0	0	193.5	0	261;126	n	0.05	12	215.5	12	220;211	y	0.23	60	200	60	215;185	y	0.19	64	275	64	326;224	y	0.0318977	5.77843	up	ENSG00000163950.12	SLBP	chr4	protein_coding	stem-loop binding protein
known_NIR_11475	chr4	1700070	1711874	-	1703700	1711874	A3SS&ES	ENST00000318386.8	known	0	0	126	0	126	n	0.05	12	211	12	211	y	0.24	60	185	60	185	y	0.22	64	224	64	224	y	0.0480761	7.61351	up	ENSG00000163950.12	SLBP	chr4	protein_coding	stem-loop binding protein
known_NIR_11499	chr4	2042175	2042327	+	2042068	2042327	A5SS	ENST00000409248.8	known	0.3	85	197	85	197	y	0.26	53	148	53	148	y	0.17	21	101	21	101	y	0.14	30	186	30	186	y	0.0439076	-5	down	ENSG00000243449.6	C4orf48	chr4	protein_coding	chromosome 4 open reading frame 48
known_NIR_11586	chr4	53391139	53399730	+	53391139;53391498	53391430;53399730	ES	ENST00000337488.10	known	0.85	68	12	68	16;8	y	0.78	91	25.5	91	12;39	y	0.56	112	87.5	112	88;87	y	0.63	85	49.5	85	37;62	y	0.0470742	-4.44467	down	ENSG00000145216.15	FIP1L1	chr4	protein_coding	factor interacting with PAPOLA and CPSF1
known_NIR_11662	chr4	88790627	88822976	-	88790627;88805052	88805011;88822976	ES	ENST00000395002.6	known	0.28	11	28.5	11	25;32	y	0.27	11	29.5	11	26;33	y	0.15	6	35	6	41;29	y	0.16	7	36.5	7	32;41	y	0.00345424	-16.9706	down	ENSG00000138640.14	FAM13A	chr4	protein_coding	family with sequence similarity 13, member A
known_NIR_11671	chr4	94278733	94278929	+	94278733	94278923	A3SS	ENST00000457823.6	known	1	8	0	8	0	n	0.96	26	1	26	1	n	0.66	31	16	31	16	y	0.72	13	5	13	5	y	0.0222268	-8.04315	down	ENSG00000163104.17	SMARCAD1	chr4	protein_coding	SWI/SNF-related, matrix-associated actin-dependent regulator of chromatin, subfamily a, containing DEAD/H box 1
known_NIR_11703	chr5	1036384;1037698	1037520;1037805	+	1036384	1037805	cassetteExon	ENST00000296849.9	known	0.01	1	134	0;2	134	n	0	0	84	0;0	84	n	0.1	11.5	101	10;13	101	y	0.12	15.5	112	20;11	112	y	0.0273751	9.39149	up	ENSG00000145506.13	NKD2	chr5	protein_coding	naked cuticle homolog 2 (Drosophila)
known_NIR_11750	chr5	132218644	132227790	-	132218644;132227258	132227086;132227790	ES	ENST00000379086.5	known	0.65	211	113	211	226;0	n	0.61	112	70.5	112	127;14	y	0.51	81	77.5	81	145;10	y	0.47	140	158.5	140	276;41	y	0.0384761	-4.94975	down	ENSG00000072682.18	P4HA2	chr5	protein_coding	prolyl 4-hydroxylase, alpha polypeptide II
known_NIR_11843	chr5	140642671	140642907	+	140642671	140642925	A3SS	ENST00000394671.7	known	0.61	20	13	20	13	y	0.5	3	3	3	3	n	0	0	11	0	11	n	0.11	4	34	4	34	y	0.0233555	-6.42824	down	ENSG00000113119.12	TMCO6	chr5	protein_coding	transmembrane and coiled-coil domains 6
known_NIR_11844	chr5	140645725	140647256	-	140645678	140647256	A3SS	ENST00000252102.8	known	0.07	28	364	28	364	y	0.06	37	567	37	567	y	0.1	51	451	51	451	y	0.11	48	380	48	380	y	0.0298575	5.65685	up	ENSG00000131495.8	NDUFA2	chr5	protein_coding	NADH dehydrogenase (ubiquinone) 1 alpha subcomplex, 2, 8kDa
known_NIR_11891	chr5	149239888;149240774	149240676;149242491	+	149239888	149242491	cassetteExon	ENST00000326685.11	known	0.43	10.5	14	8;13	14	y	0.5	14	14	14;14	14	y	0	0	11	0;0	11	n	0.11	3.5	29	0;7	29	n	0.0358918	-6.28911	down	ENSG00000173210.19	ABLIM3	chr5	protein_coding	actin binding LIM protein family, member 3
known_NIR_11935	chr5	154858816	154863207	+	154858768	154863207	A5SS	ENST00000517876.5	known	0.18	52	236	52	236	y	0.17	38	183	38	183	y	0.14	56	344	56	344	y	0.13	47	304	47	304	y	0.0298575	-5.65685	down	ENSG00000155508.13	CNOT8	chr5	protein_coding	CCR4-NOT transcription complex, subunit 8
known_NIR_12066	chr5	180809076	180810040	-	180809076	180809634	5pMXE	ENST00000446023.6	known	0	0	68	0	68	n	0.08	4	44	4	44	y	0.47	29	33	29	33	y	0.36	28	50	28	50	y	0.0381463	5.51411	up	ENSG00000131446.15	MGAT1	chr5	protein_coding	mannosyl (alpha-1,3-)-glycoprotein beta-1,2-N-acetylglucosaminyltransferase
known_NIR_12237	chr5	70070751	70077019	+	70070751	70076521	3pMXE	ENST00000511812.5	known	0.54	156	133	156	133	y	0.49	136	141	136	141	y	0.68	287	134	287	134	y	0.73	247	90	247	90	y	0.0329255	5.37401	up	ENSG00000205571.12	SMN2	chr5	protein_coding	survival of motor neuron 2, centromeric
known_NIR_12238	chr5	70070751	70077019	+	70070751;70076574	70076521;70077019	ES	ENST00000380743.8	known	0.48	156	170	156	133;207	y	0.45	136	166	136	141;191	y	0.64	287	159	287	134;184	y	0.66	247	130	247	90;170	y	0.014634	10.262	up	ENSG00000205571.12	SMN2	chr5	protein_coding	survival of motor neuron 2, centromeric
known_NIR_12343	chr6	106316266	106325526	-	106316266	106325276	5pMXE	ENST00000343245.7	known	0.77	33	10	33	10	y	0.73	37	14	37	14	y	0.93	63	5	63	5	y	0.89	91	11	91	11	y	0.0298575	5.65685	up	ENSG00000057663.12	ATG5	chr6	protein_coding	autophagy related 5
known_NIR_12559	chr6	17513954	17539269	+	17463073	17539269	A5SS	ENST00000489374.5	known	0.71	29	12	29	12	y	0.69	18	8	18	8	y	1	75	0	75	0	n	0.98	57	1	57	1	n	0.00236967	20.5061	up	ENSG00000112186.11	CAP2	chr6	protein_coding	CAP, adenylate cyclase-associated protein, 2 (yeast)
known_NIR_12583	chr6	26124633	26138054	+	26124749	26138054	A5SS	ENST00000377791.3	known	0.17	14	70	14	70	y	0.15	11	60	11	60	y	0.25	15	45	15	45	y	0.27	12	33	12	33	y	0.0194193	7.07107	up	ENSG00000180573.9	HIST1H2AC	chr6	protein_coding	histone cluster 1, H2ac
known_NIR_12599	chr6	28225366	28227012	+	28225330	28227012	A5SS	ENST00000531981.5	known	1	26	0	26	0	n	0.96	27	1	27	1	n	0.61	20	13	20	13	y	0.58	26	19	26	19	y	0.00569588	-15.4	down	ENSG00000137185.11	ZSCAN9	chr6	protein_coding	zinc finger and SCAN domain containing 9
known_NIR_12725	chr6	31760839	31761185	+	31760839	31761188	A3SS	ENST00000375755.7	known	0.43	23	30	23	30	y	0.44	12	15	12	15	y	0.16	10	52	10	52	y	0.14	9	54	9	54	y	0.00635149	-25.4912	down	ENSG00000204410.14	MSH5	chr6	protein_coding	mutS homolog 5
known_NIR_12774	chr6	33269819;33270051	33269999;33270199	-	33269819	33270199	cassetteExon	ENST00000482399.5	known	0.89	105.5	13	94;117	13	y	0.87	100	15	91;109	15	y	0.98	79	2	69;89	2	y	0.96	69	3	66;72	3	y	0.0238129	6.36396	up	ENSG00000223501.8	VPS52	chr6	protein_coding	vacuolar protein sorting 52 homolog (S. cerevisiae)
known_NIR_12797	chr6	34247149	34247681	-	34247149;34247492	34247467;34247681	ES	ENST00000476320.5	known	0.03	6	188.5	6	211;166	y	0	0	109	0	114;104	n	0.1	8	72	8	77;67	y	0.12	12	90.5	12	76;105	y	0.0454248	5.26965	up	ENSG00000186577.11	C6orf1	chr6	protein_coding	chromosome 6 open reading frame 1
known_NIR_12954	chr6	57949068;57950011	57949859;57959028	-	57949068	57959028	cassetteExon	ENST00000450081.5	known	0.37	13.5	23	3;24	23	y	0.34	11	21	4;18	21	y	0.65	16.5	9	4;29	9	y	0.72	13	5	4;22	5	y	0.0376294	8.66622	up	ENSG00000215190.8	LINC00680	chr6	lincRNA	long intergenic non-protein coding RNA 680
known_NIR_12987	chr6	82364329	82364623	+	82363908	82364623	A5SS	ENST00000535040.4	known	0.34	40	78	40	78	y	0.28	15	39	15	39	y	0.03	2	65	2	65	y	0.11	10	84	10	84	y	0.0471695	-4.8	down	ENSG00000146242.8	TPBG	chr6	protein_coding	trophoblast glycoprotein
known_NIR_13058	chr7	100887859	100888042	+	100887859	100888054	A3SS	ENST00000618262.4	known	0.88	429	56	429	56	y	0.87	508	79	508	79	y	0.78	366	105	366	105	y	0.77	397	117	397	117	y	0.00496281	-14.1421	down	ENSG00000087087.18	SRRT	chr7	protein_coding	serrate, RNA effector molecule
known_NIR_13193	chr7	134646937;134658668	134658348;134661447	+	134646937	134661447	cassetteExon	ENST00000344924.7	known	0.14	14.5	91	7;22	91	y	0.15	25	139	16;34	139	y	0.09	7	75	14;0	75	n	0.1	9.5	83	8;11	83	y	0.0194193	-7.07107	down	ENSG00000172331.11	BPGM	chr7	protein_coding	2,3-bisphosphoglycerate mutase
known_NIR_13203	chr7	135167807	135168969	-	135167807	135168749	A5SS	ENST00000617987.1	known	0.28	40	102	40	102	y	0.25	28	84	28	84	y	0.14	24	150	24	150	y	0.16	16	83	16	83	y	0.0329611	-6.37905	down	ENSG00000122783.16	C7orf49	chr7	protein_coding	chromosome 7 open reading frame 49
known_NIR_13257	chr7	143621503	143702981	+	143621020	143702981	A5SS	ENST00000444908.6	known	0.5	27	27	27	27	y	0.47	14	16	14	16	y	0.3	6	14	6	14	y	0.25	13	39	13	39	y	0.0312522	-7.20294	down	ENSG00000170379.19	TCAF2	chr7	protein_coding	TRPM8 channel-associated factor 2
known_NIR_13307	chr7	151120145	151122725	+	151120145	151123794	A3SS	ENST00000463381.5	known	0.49	48	50	48	50	y	0.48	48	52	48	52	y	0.38	44	73	44	73	y	0.39	65	101	65	101	y	0.00496281	-14.1421	down	ENSG00000133612.18	AGAP3	chr7	protein_coding	ArfGAP with GTPase domain, ankyrin repeat and PH domain 3
known_NIR_13540	chr7	50703908;50732368	50732272;50755887	-	50703908;50705323	50705140;50755887	MXE	ENST00000406641.5	known	0.69	48	22	30;66	29;15	y	0.68	32.5	15.5	27;38	29;2	y	0.55	39.5	32.5	50;29	65;0	n	0.53	67	59	73;61	118;0	n	0.0170999	-12.9692	down	ENSG00000106070.17	GRB10	chr7	protein_coding	growth factor receptor-bound protein 10
known_NIR_13565	chr7	56073111	56074586	+	56073111	56078102	A3SS	ENST00000395435.6	known	0.97	57	2	57	2	y	1	108	0	108	0	n	0.85	143	25	143	25	y	0.84	68	13	68	13	y	0.0468821	-8.85438	down	ENSG00000129103.17	SUMF2	chr7	protein_coding	sulfatase modifying factor 2
known_NIR_13603	chr7	65873565	65954074	+	65873565;65948780	65948671;65954074	ES	ENST00000360768.3	known	0.04	3	76	3	65;87	y	0.02	2	119	2	95;143	y	0.15	25	145.5	25	158;133	y	0.13	27	185	27	186;184	y	0.0161301	7.77817	up	ENSG00000196715.5	VKORC1L1	chr7	protein_coding	vitamin K epoxide reductase complex, subunit 1-like 1
known_NIR_13665	chr7	76005404	76013742	-	76005404	76028642	A5SS	ENST00000360591.7	known	0.92	146	13	146	13	y	0.91	130	13	130	13	y	0.95	174	10	174	10	y	0.96	108	4	108	4	y	0.0298575	5.65685	up	ENSG00000127952.16	STYXL1	chr7	protein_coding	serine/threonine/tyrosine interacting-like 1
known_NIR_13844	chr8	12429114	12432082	-	12429114;12430451	12430350;12432082	ES	ENST00000262365.8	known	0.72	34	13	34	26;0	n	0.7	13	5.5	13	3;8	y	0.86	27	4.5	27	8;1	n	0.89	31	4	31	6;2	y	0.0178144	9.15255	up	ENSG00000145002.12	FAM86B2	chr8	protein_coding	family with sequence similarity 86, member B2
known_NIR_13897	chr8	140925749	141000880	-	140925749	141001125	A5SS	ENST00000522684.5	known	0.43	28	37	28	37	y	0.44	11	14	11	14	y	0	0	42	0	42	n	0.02	1	41	1	41	n	0.0035314	-38.0132	down	ENSG00000169398.19	PTK2	chr8	protein_coding	protein tyrosine kinase 2
known_NIR_13985	chr8	143938692	143975177	-	143938692	143943779	5pMXE	ENST00000354589.7	known	0.69	61	28	61	28	y	0.67	34	17	34	17	y	0.76	25	8	25	8	y	0.75	63	21	63	21	y	0.0445338	6.7082	up	ENSG00000178209.14	PLEC	chr8	protein_coding	plectin
known_NIR_13992	chr8	144082804	144083389	+	144082804;144083303	144083124;144083389	ES	ENST00000355091.8	known	0.14	39	243.5	39	262;225	y	0.13	35	229.5	35	191;268	y	0.03	6	194.5	6	191;198	y	0.01	2	228.5	2	186;271	y	0.0239816	-10.2859	down	ENSG00000197858.10	GPAA1	chr8	protein_coding	glycosylphosphatidylinositol anchor attachment 1
known_NIR_14023	chr8	144851395	144852839	-	144851395	144853372	A5SS	ENST00000450361.2	known	0.65	43	23	43	23	y	0.63	93	55	93	55	y	0.73	69	26	69	26	y	0.75	38	13	38	13	y	0.0194193	7.07107	up	ENSG00000170619.9	COMMD5	chr8	protein_coding	COMM domain containing 5
known_NIR_14069	chr8	22630578	22636922	-	22630578;22636586	22636525;22636922	ES	ENST00000276416.10	known	0.08	11	134	11	118;150	y	0.07	13	166	13	148;184	y	0.11	15	116.5	15	80;153	y	0.12	25	182	25	163;201	y	0.0298575	5.65685	up	ENSG00000147439.11	BIN3	chr8	protein_coding	bridging integrator 3
known_NIR_14238	chr8	73959818	73970579	-	73959818	73972077	A5SS	ENST00000520242.5	known	0.02	5	318	5	318	y	0.01	2	391	2	391	y	0.06	18	300	18	300	y	0.05	13	254	13	254	y	0.0298575	5.65685	up	ENSG00000154582.16	TCEB1	chr8	protein_coding	transcription elongation factor B (SIII), polypeptide 1 (15kDa, elongin C)
known_NIR_14239	chr8	73959818	73970579	-	73959818	73972245	A5SS	ENST00000518127.5	known	0.02	5	268	5	268	y	0.01	2	203	2	203	y	0.06	18	286	18	286	y	0.05	13	262	13	262	y	0.0298575	5.65685	up	ENSG00000154582.16	TCEB1	chr8	protein_coding	transcription elongation factor B (SIII), polypeptide 1 (15kDa, elongin C)
known_NIR_14255	chr8	81681584;81685963	81685763;81686252	-	81681584	81686252	cassetteExon	ENST00000256108.9	known	0.01	0.5	34	1;0	34	n	0.03	2	62	0;4	62	n	0.16	3.5	18	7;0	18	n	0.13	8	52	11;5	52	y	0.0286201	6.93375	up	ENSG00000133731.9	IMPA1	chr8	protein_coding	inositol(myo)-1(or 4)-monophosphatase 1
known_NIR_14369	chr9	121268219;121281953	121281470;121301963	+	121268219	121301963	cassetteExon	ENST00000373808.6	known	0.7	32	14	64;0	14	n	0.6	49.5	33	99;0	33	n	1	58	0	97;19	0	n	0.94	87.5	6	171;4	6	y	0.0481499	5.48795	up	ENSG00000148180.16	GSN	chr9	protein_coding	gelsolin
known_NIR_14428	chr9	125332629	125337018	+	125332629;125335252	125335172;125337018	ES	ENST00000394105.6	known	0.97	127	4.5	127	0;9	n	1	54	0	54	0;0	n	0.88	116	16	116	22;10	y	0.86	130	20.5	130	16;25	y	0.0329611	-6.37905	down	ENSG00000165219.21	GAPVD1	chr9	protein_coding	GTPase activating protein and VPS9 domains 1
known_NIR_14734	chr9	36249397	36258321	-	36249397	36276894	A5SS	ENST00000396594.7	known	0.85	61	11	61	11	y	0.88	46	6	46	6	y	0.72	43	17	43	17	y	0.7	53	23	53	23	y	0.0198301	-8.59785	down	ENSG00000159921.14	GNE	chr9	protein_coding	glucosamine (UDP-N-acetyl)-2-epimerase/N-acetylmannosamine kinase
known_NIR_14816	chr9	92079566	92080016	-	92068098	92080016	A3SS	ENST00000262554.6	known	0.18	16	75	16	75	y	0.15	33	186	33	186	y	0.06	16	231	16	231	y	0.08	18	216	18	216	y	0.0454248	-5.26965	down	ENSG00000090054.13	SPTLC1	chr9	protein_coding	serine palmitoyltransferase, long chain base subunit 1
known_NIR_15028	chrX	152922256;152928661	152928575;152931672	+	152922256;152922809	152922720;152931672	MXE	ENST00000539731.5	known	0.73	87.5	32	9;166	44;20	y	0.7	49	21.5	19;79	23;20	y	0.58	56	40.5	34;78	55;26	y	0.6	59	39.5	41;77	63;16	y	0.0286201	-6.93375	down	ENSG00000147394.18	ZNF185	chrX	protein_coding	zinc finger protein 185 (LIM domain)
known_NIR_15038	chrX	153723288	153723508	-	153723288	153724334	A5SS	ENST00000345046.10	known	0.17	143	705	143	705	y	0.18	131	615	131	615	y	0.21	138	532	138	532	y	0.22	178	637	178	637	y	0.0298575	5.65685	up	ENSG00000185825.15	BCAP31	chrX	protein_coding	B-cell receptor-associated protein 31
known_NIR_15060	chrX	154507490;154507882	154507811;154508289	-	154507490	154508289	cassetteExon	ENST00000419205.5	known	0.49	54.5	57	80;29	57	y	0.54	51	43	89;13	43	y	0.71	89.5	36	157;22	36	y	0.66	87	44	141;33	44	y	0.0406345	4.80833	up	ENSG00000071889.16	FAM3A	chrX	protein_coding	family with sequence similarity 3, member A
novel_NIR_330	chr1	117877841	117878009	-	117870616	117878009	A3SS	ENST00000369443.9	novel	0.2	3	12	3	12	y	0.23	3	10	3	10	n	0.09	3	31	3	31	n	0.11	8	64	8	64	n	0.0329611	-6.37905	down	ENSG00000196505.10	GDAP2	chr1	protein_coding	ganglioside induced differentiation associated protein 2
novel_NIR_986	chr1	155916709	155917499	-	155916737	155917499	A3SS	ENST00000368321.7	novel	0	0	44	0	44	n	0.05	4	75	4	75	n	0.22	24	87	24	87	y	0.26	27	77	27	77	y	0.0241881	6.71547	up	ENSG00000132680.10	KIAA0907	chr1	protein_coding	KIAA0907
novel_NIR_1106	chr1	160205522;160207068	160207028;160211543	+	160205522;160208665	160207133;160211543	MXE	ENST00000368076.1	novel	0.51	22.5	21.5	34;11	17;26	y	0.46	29.5	34	47;12	20;48	y	0.3	20.5	48.5	37;4	31;66	y	0.26	18	52	36;0	14;90	n	0.0264129	-6.40312	down	ENSG00000162734.12	PEA15	chr1	protein_coding	phosphoprotein enriched in astrocytes 15
novel_NIR_1236	chr1	165768269	165768482	-	165768269	165768759	A5SS	ENST00000464650.5	novel	0.06	6	93	6	93	n	0	0	120	0	120	n	0.25	27	82	27	82	y	0.21	13	49	13	49	y	0.0416957	5.547	up	ENSG00000143183.16	TMCO1	chr1	protein_coding	transmembrane and coiled-coil domains 1
novel_NIR_1766	chr1	20780540	20786186	-	20780540	20786649	A5SS	ENST00000312239.9	novel	0.3	11	26	11	26	y	0.33	14	28	14	28	y	0.48	41	44	41	44	y	0.51	30	29	30	29	y	0.0136061	8.48528	up	ENSG00000127483.17	HP1BP3	chr1	protein_coding	heterochromatin protein 1, binding protein 3
novel_NIR_1931	chr1	222815078	222835119	+	222815078	222823884	A3SS&ES	ENST00000495684.2	novel	0.19	7	29	7	29	y	0	0	2	0	2	n	0.74	23	8	23	8	y	0.57	16	12	16	12	y	0.0491805	4.393	up	ENSG00000278610.1	RP11-455P21.3	chr1	lincRNA		--
novel_NIR_2150	chr1	233905758	233905988	+	233905758	234231417	A3SS	ENST00000366618.7	novel	0.33	11	22	11	22	y	0.4	16	24	16	24	y	0.07	3	41	3	41	n	0	0	60	0	60	n	0.0217659	-6.66701	down	ENSG00000183780.12	SLC35F3	chr1	protein_coding	solute carrier family 35, member F3
novel_NIR_2774	chr1	39753052	39763651	+	39753052	39762517	A3SS&ES	ENST00000372830.5	novel	0.08	1	11	1	11	n	0	0	11	0	11	n	0.4	4	6	4	6	y	0.46	11	13	11	13	y	0.0198068	7.8	up	ENSG00000084072.16	PPIE	chr1	protein_coding	peptidylprolyl isomerase E (cyclophilin E)
novel_NIR_2775	chr1	39753052	39763651	+	39753052	39763689	A3SS	ENST00000356511.6	novel	0.02	1	43	1	43	n	0	0	5	0	5	n	0.67	4	2	4	2	y	0.58	11	8	11	8	y	0.0377117	13.3412	up	ENSG00000084072.16	PPIE	chr1	protein_coding	peptidylprolyl isomerase E (cyclophilin E)
novel_NIR_2895	chr1	43653313;43653799	43653663;43655591	+	43653313	43655591	cassetteExon	ENST00000372396.3	novel	0.03	2.5	92	5;0	92	n	0.04	2	53	0;4	53	n	0.17	15	73	23;7	73	y	0.15	13.5	79	14;13	79	y	0.0212375	11.1803	up	ENSG00000066135.12	KDM4A	chr1	protein_coding	lysine (K)-specific demethylase 4A
novel_NIR_3072	chr1	45661225	45686993	-	45661225	45686412	5pMXE	ENST00000290795.7	novel	0.31	23	51	23	51	y	0.39	23	36	23	36	y	0.57	36	27	36	27	y	0.66	55	28	55	28	y	0.049137	4.40141	up	ENSG00000159592.10	GPBP1L1	chr1	protein_coding	GC-rich promoter binding protein 1-like 1
novel_NIR_3614	chr1	962047	962286	+	962047	962355	A3SS	ENST00000338591.7	novel	0.57	12	9	12	9	y	0.64	7	4	7	4	y	0	0	40	0	40	n	0.07	2	25	2	25	n	0.00745654	-11.5157	down	ENSG00000187961.13	KLHL17	chr1	protein_coding	kelch-like family member 17
novel_NIR_4139	chr10	14878919	14896846	+	14878919;14881645	14881500;14896846	ES	ENST00000378325.7	novel	0.33	4	8	4	6;10	y	0.3	8	18.5	8	12;25	y	0.67	13	6.5	13	2;11	y	0.71	17	7	17	0;14	y	0.00597906	15	up	ENSG00000152455.15	SUV39H2	chr10	protein_coding	suppressor of variegation 3-9 homolog 2 (Drosophila)
novel_NIR_4317	chr10	33194780	33197650	-	33192418	33197650	A3SS	ENST00000374875.5	novel	0.31	11	24	11	24	y	0.38	13	21	13	21	y	0	0	28	0	28	n	0.07	2	28	2	28	n	0.024559	-6.26295	down	ENSG00000099250.17	NRP1	chr10	protein_coding	neuropilin 1
novel_NIR_4328	chr10	34360259	34377967	-	34360259;34375002	34374874;34377967	ES	ENST00000545693.5	novel	0	0	113.5	0	117;110	n	0.02	2	110	2	112;108	n	0.19	40	169	40	158;180	y	0.18	33	154	33	168;140	y	0.012987	15.6525	up	ENSG00000148498.15	PARD3	chr10	protein_coding	par-3 family cell polarity regulator
novel_NIR_5286	chr11	117380714	117381701	+	117380705	117381701	A5SS	ENST00000278935.7	novel	0.28	9	23	9	23	y	0.24	13	41	13	41	y	0.09	4	40	4	40	n	0.12	6	44	6	44	n	0.0299646	-6.2	down	ENSG00000110274.14	CEP164	chr11	protein_coding	centrosomal protein 164kDa
novel_NIR_5316	chr11	119011311	119011939	+	119011283	119011939	A5SS	ENST00000334418.5	novel	0.05	9	162	9	162	n	0.03	6	175	6	175	n	0.27	54	146	54	146	y	0.24	42	133	42	133	y	0.0112934	11.9261	up	ENSG00000186166.8	CCDC84	chr11	protein_coding	coiled-coil domain containing 84
novel_NIR_5617	chr11	130895156	130903255	-	130880806	130903255	A3SS	ENST00000265909.8	novel	0.17	6	29	6	29	y	0.15	7	40	7	40	y	0.26	11	31	11	31	y	0.24	22	69	22	69	y	0.0238129	6.36396	up	ENSG00000120451.10	SNX19	chr11	protein_coding	sorting nexin 19
novel_NIR_5716	chr11	17987371	17988597	-	17878244	17988597	A3SS	ENST00000528200.5	novel	0.42	10	14	10	14	y	0.53	18	16	18	16	y	0	0	27	0	27	n	0.1	3	28	3	28	n	0.0298559	-5.71772	down	ENSG00000129158.10	SERGEF	chr11	protein_coding	secretion regulating guanine nucleotide exchange factor
novel_NIR_6162	chr11	47765362	47767063	-	47765362	47767069	A5SS	ENST00000263773.9	novel	0.06	3	46	3	46	n	0.1	3	26	3	26	n	0.24	13	42	13	42	y	0.27	13	35	13	35	y	0.0240904	7	up	ENSG00000109920.12	FNBP4	chr11	protein_coding	formin binding protein 4
novel_NIR_6374	chr11	61816711	61837778	+	61816696	61837778	A5SS	ENST00000522056.5	novel	0	0	56	0	56	n	0.03	1	35	1	35	n	0.21	16	60	16	60	y	0.18	10	45	10	45	y	0.0136061	8.48528	up	ENSG00000134824.13	FADS2	chr11	protein_coding	fatty acid desaturase 2
novel_NIR_6472	chr11	64224970	64226050	-	64224970;64225580	64225499;64226050	ES	ENST00000394547.7	novel	0.04	4	86	4	138;34	n	0	0	56.5	0	86;27	n	0.27	29	79.5	29	91;68	y	0.26	25	69.5	25	110;29	y	0.0403995	11.8842	up	ENSG00000149743.13	TRPT1	chr11	protein_coding	tRNA phosphotransferase 1
novel_NIR_6473	chr11	64225869	64226062	-	64225869	64226050	A5SS	ENST00000541278.5	novel	0.06	6	102	6	102	n	0.13	16	107	16	107	n	0.35	44	80	44	80	y	0.4	33	50	33	50	y	0.02912	6.50987	up	ENSG00000149743.13	TRPT1	chr11	protein_coding	tRNA phosphotransferase 1
novel_NIR_7271	chr11	85628688;85629203	85629132;85631687	+	85628688;85631316	85631145;85631687	MXE	ENST00000393375.5	novel	0.1	15.5	142	23;8	146;138	n	0.09	19	183.5	25;13	197;170	n	0.22	64.5	223	114;15	162;284	y	0.21	51	189.5	83;19	158;221	y	0.00345424	16.9706	up	ENSG00000171204.12	TMEM126B	chr11	protein_coding	transmembrane protein 126B
novel_NIR_7490	chr12	104131838	104135448	-	104128517	104135448	A3SS	ENST00000240055.7	novel	0.15	13	72	13	72	y	0.13	13	84	13	84	n	0.02	3	146	3	146	n	0	0	152	0	152	n	0.0116283	-9.19239	down	ENSG00000120837.7	NFYB	chr12	protein_coding	nuclear transcription factor Y, beta
novel_NIR_7695	chr12	111470742;111479102	111479070;111485265	-	111470742	111485265	cassetteExon	ENST00000389153.8	novel	0.54	7	6	10;4	6	y	0.45	18	22	18;18	22	y	0.14	4.5	28	9;0	28	n	0	0	62	0;0	62	n	0.0498486	-5.10716	down	ENSG00000204842.14	ATXN2	chr12	protein_coding	ataxin 2
novel_NIR_8074	chr12	131929404	131929907	+	131929796	131929907	A5SS	ENST00000376649.7	novel	0.2	57	234	57	234	y	0.18	45	207	45	207	y	0.09	20	191	20	191	n	0.1	21	185	21	185	n	0.0316556	-8.49706	down	ENSG00000177192.13	PUS1	chr12	protein_coding	pseudouridylate synthase 1
novel_NIR_8288	chr12	31103020	31103577	+	31103020;31103395	31103322;31103577	ES	ENST00000545668.5	novel	0.16	10	53	10	19;87	y	0.19	14	58.5	14	23;94	y	0.02	1	55	1	7;103	n	0.06	4	60	4	11;109	n	0.0383286	-5.4	down	ENSG00000013573.16	DDX11	chr12	protein_coding	DEAD/H (Asp-Glu-Ala-Asp/His) box helicase 11
novel_NIR_8473	chr12	47879115	47899837	-	47879115;47882774	47882694;47899837	ES	ENST00000229022.7	novel	0.34	19	37	19	74;0	y	0.32	20	42	20	81;3	y	0	0	55.5	0	98;13	n	0.05	3	57	3	114;0	n	0.0287064	-11.3274	down	ENSG00000111424.10	VDR	chr12	protein_coding	vitamin D (1,25- dihydroxyvitamin D3) receptor
novel_NIR_8513	chr12	48774098	48775303	-	48775054	48775303	A3SS&ES	ENST00000357869.7	novel	0.27	22	60	22	60	y	0.29	10	24	10	24	y	0.2	11	45	11	45	y	0.21	18	67	18	67	y	0.0445338	-6.7082	down	ENSG00000174233.11	ADCY6	chr12	protein_coding	adenylate cyclase 6
novel_NIR_8658	chr12	51076647	51083229	-	51076647	51083339	A5SS	ENST00000228515.5	novel	0.6	6	4	6	4	y	0.57	8	6	8	6	y	0.23	3	10	3	10	y	0.3	6	14	6	14	y	0.039211	-8.40361	down	ENSG00000110925.6	CSRNP2	chr12	protein_coding	cysteine-serine-rich nuclear protein 2
novel_NIR_8739	chr12	53442733	53443396	+	53442733	53443567	A3SS	ENST00000549068.5	novel	0.83	20	4	20	4	y	0.85	22	4	22	4	y	0.05	1	21	1	21	n	0.07	1	14	1	14	n	0.000328569	-55.1543	down	ENSG00000205352.10	PRR13	chr12	protein_coding	proline rich 13
novel_NIR_8744	chr12	53464852	53467221	+	53462567	53467221	A5SS	ENST00000549863.5	novel	0.46	130	151	130	151	y	0.43	90	118	90	118	y	0.35	118	220	118	220	y	0.32	127	268	127	268	y	0.0352362	-5.18545	down	ENSG00000197111.15	PCBP2	chr12	protein_coding	poly(rC) binding protein 2
novel_NIR_8854	chr12	55932123	55936423	+	55931344	55936423	A5SS	ENST00000331886.9	novel	0.38	6	10	6	10	y	0.33	4	8	4	8	y	0.57	25	19	25	19	y	0.63	38	22	38	22	y	0.026453	6.27381	up	ENSG00000065357.19	DGKA	chr12	protein_coding	diacylglycerol kinase, alpha 80kDa
novel_NIR_9448	chr12	98626766	98644523	-	98626766;98634413	98634296;98644523	ES	ENST00000299157.4	novel	0.08	7	80.5	7	59;102	n	0.09	13	130	13	124;136	n	0.18	25	113.5	25	114;113	y	0.17	21	105	21	92;118	y	0.00611627	12.7279	up	ENSG00000166130.14	IKBIP	chr12	protein_coding	IKBKB interacting protein
novel_NIR_10030	chr14	100097658	100106024	+	100097658	100123539	A3SS	ENST00000402714.6	novel	0.27	34	93	34	93	y	0.22	21	73	21	73	y	0.02	4	168	4	168	n	0.08	15	177	15	177	n	0.0403689	-4.99344	down	ENSG00000196405.12	EVL	chr14	protein_coding	Enah/Vasp-like
novel_NIR_10518	chr14	31453344	31457029	-	31453344	31457283	A5SS	ENST00000547378.1	novel	0.97	31	1	31	1	y	0.84	21	4	21	4	y	0.12	4	30	4	30	n	0.26	6	17	6	17	y	0.0176501	-7.48496	down	ENSG00000203546.7	RP11-176H8.1	chr14	protein_coding		--
novel_NIR_11047	chr14	89955970	89966147	+	89955970;89963673	89963108;89966147	ES	ENST00000393454.6	novel	0.22	4	14	4	6;22	y	0.23	10	33.5	10	14;53	y	0.02	1	41	1	26;56	n	0	0	40	0	18;62	n	0.00960498	-19.2302	down	ENSG00000042088.13	TDP1	chr14	protein_coding	tyrosyl-DNA phosphodiesterase 1
novel_NIR_11048	chr14	89955970	89966147	+	89963673	89966147	5pMXE	ENST00000555880.5	novel	0.15	4	22	4	22	y	0.16	10	53	10	53	y	0.02	1	56	1	56	n	0	0	62	0	62	n	0.0170999	-12.9692	down	ENSG00000042088.13	TDP1	chr14	protein_coding	tyrosyl-DNA phosphodiesterase 1
novel_NIR_11151	chr15	100573300	100573651	-	100572065	100573651	A3SS	ENST00000314742.12	novel	0.62	10	6	10	6	y	0.52	11	10	11	10	y	1	17	0	17	0	y	0.9	18	2	18	2	y	0.0329255	5.37401	up	ENSG00000140471.16	LINS	chr15	protein_coding	lines homolog (Drosophila)
novel_NIR_11789	chr15	60386086	60396280	-	60386086	60397871	A5SS	ENST00000332680.8	novel	0.13	19	126	19	126	n	0.15	24	141	24	141	y	0.06	11	176	11	176	n	0.07	13	171	13	171	n	0.0445338	-6.7082	down	ENSG00000182718.16	ANXA2	chr15	protein_coding	annexin A2
novel_NIR_12007	chr15	72219110	72228577	-	72219110	72229547	A5SS	ENST00000568459.5	novel	0.15	6	33	6	33	y	0.12	3	23	3	23	n	0.43	10	13	10	13	y	0.5	11	11	11	11	y	0.0376294	8.66622	up	ENSG00000067225.17	PKM	chr15	protein_coding	pyruvate kinase, muscle
novel_NIR_12363	chr15	89244044	89247629	+	89244033	89247629	A5SS	ENST00000300027.12	novel	0.37	21	36	21	36	y	0.41	21	30	21	30	y	0.25	18	54	18	54	y	0.2	14	56	14	56	y	0.0392905	-5.15373	down	ENSG00000140525.17	FANCI	chr15	protein_coding	Fanconi anemia, complementation group I
novel_NIR_12419	chr15	90912279	90912517	+	90912279	90912542	A3SS	ENST00000559717.5	novel	0.3	10	23	10	23	y	0.33	3	6	3	6	y	0.11	5	39	5	39	n	0.13	2	13	2	13	n	0.0133654	-10.8167	down	ENSG00000196547.14	MAN2A2	chr15	protein_coding	mannosidase, alpha, class 2A, member 2
novel_NIR_12712	chr16	15694256	15724191	+	15694256;15696860	15696709;15724191	ES	ENST00000396355.5	novel	0.22	19	67	19	97;37	y	0.17	10	49.5	10	91;8	y	0.04	2	45.5	2	91;0	n	0	0	94.5	0	153;36	n	0.0353057	-5.46608	down	ENSG00000072864.12	NDE1	chr16	protein_coding	nudE neurodevelopment protein 1
novel_NIR_12830	chr16	1962270;1962649	1962506;1962736	-	1962270	1962736	cassetteExon	ENST00000530225.5	novel	0.03	1	35	0;2	35	n	0	0	65	0;0	65	n	0.72	139	55	0;278	55	n	0.7	145.5	63	2;289	63	y	0.00147269	38.5517	up	ENSG00000140988.15	RPS2	chr16	protein_coding	ribosomal protein S2
novel_NIR_12832	chr16	1962649	1962736	-	1962270	1962736	A3SS	ENST00000530225.5	novel	0.05	2	35	2	35	n	0	0	65	0	65	n	0.83	278	55	278	55	y	0.82	289	63	289	63	n	0.0156728	31.3786	up	ENSG00000140988.15	RPS2	chr16	protein_coding	ribosomal protein S2
novel_NIR_13009	chr16	2538136	2538619	+	2538136	2557703	A3SS	ENST00000342085.8	novel	0.05	2	40	2	40	n	0.09	5	53	5	53	n	0.26	14	40	14	40	y	0.31	11	24	11	24	y	0.0241881	6.71547	up	ENSG00000140992.18	PDPK1	chr16	protein_coding	3-phosphoinositide dependent protein kinase 1
novel_NIR_13166	chr16	29900566	29901552	+	29900741	29901552	A5SS	ENST00000483405.5	novel	0.21	73	276	73	276	y	0.18	45	208	45	208	y	0.07	13	161	13	161	n	0.1	24	216	24	216	n	0.0352362	-5.18545	down	ENSG00000174939.10	ASPHD1	chr16	protein_coding	aspartate beta-hydroxylase domain containing 1
novel_NIR_13784	chr16	67278790	67279876	+	67279276	67279876	5pMXE	ENST00000427155.6	novel	0.82	66	14	66	14	y	0.85	46	8	46	8	y	1	45	0	45	0	y	0.98	47	1	47	1	y	0.0198301	8.59785	up	ENSG00000196155.12	PLEKHG4	chr16	protein_coding	pleckstrin homology domain containing, family G (with RhoGef domain) member 4
novel_NIR_15091	chr17	35017606	35026374	-	35017606;35021781	35021371;35026374	ES	ENST00000315249.11	novel	0.03	1	29.5	1	43;16	n	0	0	33	0	43;23	n	0.15	8	44	8	40;48	y	0.2	12	47	12	59;35	y	0.0481499	5.48795	up	ENSG00000092871.16	RFFL	chr17	protein_coding	ring finger and FYVE-like domain containing E3 ubiquitin protein ligase
novel_NIR_15818	chr17	5422829	5426236	+	5422829	5425971	A3SS&ES	ENST00000327154.10	novel	0.21	28	104	28	104	y	0.22	33	114	33	114	y	0.31	56	123	56	123	y	0.32	46	96	46	96	y	0.00496281	14.1421	up	ENSG00000129197.14	RPAIN	chr17	protein_coding	RPA interacting protein
novel_NIR_15821	chr17	5422829	5426236	+	5422829;5426082	5425971;5426236	ES	ENST00000381209.7	novel	0.24	28	87.5	28	104;71	y	0.26	33	94	33	114;74	y	0.32	56	119	56	123;115	y	0.33	46	91.5	46	96;87	y	0.0445338	6.7082	up	ENSG00000129197.14	RPAIN	chr17	protein_coding	RPA interacting protein
novel_NIR_16331	chr17	75784984;75792019	75791760;75809760	+	75784984	75809760	cassetteExon	ENST00000589666.5	novel	0.35	17	31	30;4	31	y	0.41	20	29	40;0	29	n	0.1	3.5	30	7;0	30	n	0.13	9	61	18;0	61	n	0.0351729	-7.90077	down	ENSG00000132478.9	UNK	chr17	protein_coding	unkempt family zinc finger
novel_NIR_16448	chr17	77280806	77307141	+	77288210	77307141	5pMXE	ENST00000449803.6	novel	0.75	86	29	86	29	y	0.67	54	27	54	27	y	0.35	46	85	46	85	y	0.43	55	72	55	72	y	0.0298575	-5.65685	down	ENSG00000184640.17	SEPT9	chr17	protein_coding	septin 9
novel_NIR_16764	chr17	81189975	81190650	-	81189975	81190639	A5SS	ENST00000374782.7	novel	0.33	26	54	26	54	y	0.26	10	29	10	29	y	0.09	7	67	7	67	n	0.04	3	74	3	74	n	0.0410296	-5.34739	down	ENSG00000141577.13	CEP131	chr17	protein_coding	centrosomal protein 131kDa
novel_NIR_17847	chr19	14772005	14772342	-	14767109	14772342	A3SS	ENST00000315576.7	novel	0.05	1	18	1	18	n	0	0	8	0	8	n	0.38	17	28	17	28	y	0.29	10	25	10	25	y	0.0458325	6.02197	up	ENSG00000127507.17	ADGRE2	chr19	protein_coding	adhesion G protein-coupled receptor E2
novel_NIR_18030	chr19	18589077	18589305	+	18589077	18589479	A3SS	ENST00000450195.6	novel	0.03	1	38	1	38	n	0	0	67	0	67	n	0.17	5	24	5	24	y	0.22	6	21	6	21	y	0.0399629	6.17395	up	ENSG00000006015.17	C19orf60	chr19	protein_coding	chromosome 19 open reading frame 60
novel_NIR_18101	chr19	19386138;19457229	19457007;19465340	+	19386138	19465340	cassetteExon	ENST00000360315.7	novel	0.42	13	18	2;24	18	y	0.5	10	10	8;12	10	y	0.11	3.5	27	0;7	27	n	0.07	1.5	21	0;3	21	n	0.0329028	-8.27345	down	ENSG00000167491.17	GATAD2A	chr19	protein_coding	GATA zinc finger domain containing 2A
novel_NIR_18116	chr19	19527770	19529364	+	19527770	19535034	A3SS	ENST00000555938.1	novel	0	0	69	0	69	n	0.03	3	84	3	84	n	0.12	8	60	8	60	n	0.16	12	63	12	63	y	0.0439076	5	up	ENSG00000258674.5	CTC-260F20.3	chr19	protein_coding		--
novel_NIR_18733	chr19	42215252	42217632	-	42215252	42216680	A5SS&ES	ENST00000595337.5	novel	0.13	11	71	11	71	n	0.11	10	83	10	83	n	0.38	37	60	37	60	y	0.39	43	68	43	68	y	0.00706748	23.7023	up	ENSG00000160570.13	DEDD2	chr19	protein_coding	death effector domain containing 2
novel_NIR_18736	chr19	42215252;42217829	42217632;42220074	-	42215252;42217045	42216680;42220074	MXE	ENST00000595337.5	novel	0.13	5.5	35.5	11;0	71;0	n	0.15	8	44	10;6	83;5	y	0.32	18.5	39	37;0	60;18	n	0.36	21.5	38	43;0	68;8	n	0.0293856	8.94427	up	ENSG00000160570.13	DEDD2	chr19	protein_coding	death effector domain containing 2
novel_NIR_18984	chr19	45771056	45771568	-	45770640	45771568	A3SS	ENST00000354227.9	novel	0.2	13	53	13	53	y	0.23	8	27	8	27	y	0	0	86	0	86	n	0.02	2	91	2	91	n	0.0122611	-11.3714	down	ENSG00000104936.17	DMPK	chr19	protein_coding	dystrophia myotonica-protein kinase
novel_NIR_18985	chr19	45771056	45771568	-	45771056;45771396	45771350;45771568	ES	ENST00000600757.5	novel	0.23	13	44.5	13	38;51	y	0.21	8	30	8	24;36	y	0	0	27.5	0	19;36	n	0.04	2	45.5	2	34;57	n	0.0293856	-8.94427	down	ENSG00000104936.17	DMPK	chr19	protein_coding	dystrophia myotonica-protein kinase
novel_NIR_18986	chr19	45771056	45771568	-	45771396	45771568	A3SS&ES	ENST00000291270.8	novel	0.2	13	51	13	51	y	0.18	8	36	8	36	y	0	0	36	0	36	n	0.03	2	57	2	57	n	0.016102	-9.70725	down	ENSG00000104936.17	DMPK	chr19	protein_coding	dystrophia myotonica-protein kinase
novel_NIR_19101	chr19	48633655	48634699	-	48633655	48635580	A5SS	ENST00000222122.9	novel	0.69	22	10	22	10	y	0.65	24	13	24	13	y	0.44	7	9	7	9	y	0.38	6	10	6	10	y	0.026775	-7.2111	down	ENSG00000105516.10	DBP	chr19	protein_coding	D site of albumin promoter (albumin D-box) binding protein
novel_NIR_19412	chr19	55597901	55598495	-	55597901	55599474	A5SS	ENST00000221665.4	novel	0.35	22	40	22	40	y	0.38	8	13	8	13	y	0.13	3	20	3	20	n	0.17	4	19	4	19	y	0.0165861	-8.6	down	ENSG00000179943.7	FIZ1	chr19	protein_coding	FLT3-interacting zinc finger 1
novel_NIR_19756	chr2	100933001;100935131	100934860;100937753	+	100933001	100937753	cassetteExon	ENST00000335681.9	novel	0.08	18	215	23;13	215	n	0.09	23	232	42;4	232	n	0.2	35.5	140	45;26	140	y	0.18	46.5	215	67;26	215	y	0.0273751	9.39149	up	ENSG00000170485.16	NPAS2	chr2	protein_coding	neuronal PAS domain protein 2
novel_NIR_20221	chr2	127871359;127873077	127872986;127873828	-	127871359	127873828	cassetteExon	ENST00000272647.9	novel	0.19	13.5	58	10;17	58	y	0.22	17	60	22;12	60	y	0.04	2	47	0;4	47	n	0.03	3	107	4;2	107	n	0.0370749	-10.7517	down	ENSG00000144233.9	AMMECR1L	chr2	protein_coding	AMMECR1-like
novel_NIR_20427	chr2	168063570	168074982	-	168063570;168065381	168065319;168074982	ES	ENST00000355999.4	novel	0.48	38	40.5	38	31;50	y	0.47	24	27	24	20;34	y	0.21	9	33	9	31;35	y	0.22	24	85.5	24	84;87	y	0.000738825	-36.7696	down	ENSG00000198648.10	STK39	chr2	protein_coding	serine threonine kinase 39
novel_NIR_20444	chr2	170007202	170008804	+	170007190	170008804	A5SS	ENST00000272793.9	novel	0.36	8	14	8	14	y	0.24	6	19	6	19	y	0.7	7	3	7	3	y	0.83	5	1	5	1	y	0.0348024	5.25667	up	ENSG00000144357.16	UBR3	chr2	protein_coding	ubiquitin protein ligase E3 component n-recognin 3 (putative)
novel_NIR_20733	chr2	200811727	200813208	+	200812493	200813208	5pMXE	ENST00000452790.6	novel	0.6	61	40	61	40	y	0.61	99	63	99	63	y	0.45	93	113	93	113	y	0.46	86	99	86	99	y	0.00221484	-21.2132	down	ENSG00000082153.17	BZW1	chr2	protein_coding	basic leucine zipper and W2 domains 1
novel_NIR_21001	chr2	219613930	219614476	+	219613930;219614242	219614161;219614476	ES	ENST00000456909.5	novel	0.03	2	58	2	66;50	n	0	0	41.5	0	37;46	n	0.21	7	26	7	20;32	y	0.17	7	33.5	7	28;39	y	0.0240904	7	up	ENSG00000144589.20	STK11IP	chr2	protein_coding	serine/threonine kinase 11 interacting protein
novel_NIR_21369	chr2	27312246;27312772	27312481;27322448	-	27312246;27313109	27312994;27322448	MXE	ENST00000405076.5	novel	0.11	8.5	71	12;5	0;142	n	0.12	17.5	123.5	7;28	10;237	n	0.16	17.5	89.5	5;30	13;166	y	0.17	19.5	95	0;39	8;182	n	0.0194193	7.07107	up	ENSG00000115204.14	MPV17	chr2	protein_coding	MpV17 mitochondrial inner membrane protein
novel_NIR_22035	chr2	74657624	74673457	+	74657624;74662825	74662732;74673457	ES	ENST00000611975.4	novel	0.65	16	8.5	16	0;17	y	0.5	2	2	2	0;4	y	0	0	10	0	4;16	n	0.12	1	7.5	1	8;7	n	0.0365638	-5.36197	down	ENSG00000135622.12	SEMA4F	chr2	protein_coding	sema domain, immunoglobulin domain (Ig), transmembrane domain (TM) and short cytoplasmic domain, (semaphorin) 4F
novel_NIR_22666	chr20	35366614;35382025	35381918;35394092	-	35366614;35374256	35374184;35394092	MXE	ENST00000374380.6	novel	0	0	40	0;0	80;0	n	0.01	0.5	62	0;1	118;6	n	0.23	18	60.5	0;36	115;6	n	0.21	11	41	11;11	82;0	y	0.00960498	19.2302	up	ENSG00000101019.21	UQCC1	chr20	protein_coding	ubiquinol-cytochrome c reductase complex assembly factor 1
novel_NIR_22734	chr20	36112480	36173764	+	36112480	36121660	A3SS&ES	ENST00000373950.6	novel	0.32	10	21	10	21	y	0.42	15	21	15	21	y	1	25	0	25	0	y	0.85	23	4	23	4	y	0.0349907	6.15717	up	ENSG00000088367.20	EPB41L1	chr20	protein_coding	erythrocyte membrane protein band 4.1-like 1
novel_NIR_22842	chr20	38421098;38422368	38422087;38426419	-	38421098;38426052	38425935;38426419	MXE	ENST00000417578.5	novel	0.36	15	26.5	11;19	27;26	y	0.43	24	31.5	6;42	51;12	y	0.82	57	12.5	68;46	23;2	y	0.73	34.5	13	29;40	18;8	y	0.0252519	6.66564	up	ENSG00000196756.11	SNHG17	chr20	processed_transcript	small nucleolar RNA host gene 17
novel_NIR_23178	chr20	5109445	5112730	-	5109445	5112720	A5SS	ENST00000379283.6	novel	0.94	63	4	63	4	y	0.95	40	2	40	2	y	0.9	54	6	54	6	y	0.89	55	7	55	7	y	0.0194193	-7.07107	down	ENSG00000089063.14	TMEM230	chr20	protein_coding	transmembrane protein 230
novel_NIR_23340	chr20	62860308	62860830	-	62860308	62861024	A5SS	ENST00000335351.7	novel	0.6	31	21	31	21	y	0.54	29	25	29	25	y	0.4	27	40	27	40	y	0.33	20	40	20	40	y	0.0490518	-4.44707	down	ENSG00000101190.12	TCFL5	chr20	protein_coding	transcription factor-like 5 (basic helix-loop-helix)
novel_NIR_23741	chr21	42513924	42518277	+	42514717	42518277	A5SS	ENST00000352133.2	novel	0.03	2	68	2	68	n	0	0	50	0	50	n	0.25	9	27	9	27	y	0.3	10	23	10	23	y	0.0221702	8.91793	up	ENSG00000160190.13	SLC37A1	chr21	protein_coding	solute carrier family 37 (glucose-6-phosphate transporter), member 1
novel_NIR_24574	chr22	35810004	35836320	-	35810004	35938847	A5SS	ENST00000359369.8	novel	0.52	32	29	32	29	y	0.45	10	12	10	12	y	0.21	10	38	10	38	y	0.29	21	52	21	52	y	0.049068	-4.42139	down	ENSG00000100320.22	RBFOX2	chr22	protein_coding	RNA binding protein, fox-1 homolog (C. elegans) 2
novel_NIR_24789	chr22	41532157	41532604	-	41532157	41532659	A5SS	ENST00000396504.6	novel	0	0	122	0	122	n	0.02	3	154	3	154	n	0.17	16	77	16	77	y	0.19	25	110	25	110	y	0.0068494	12.0208	up	ENSG00000100413.16	POLR3H	chr22	protein_coding	polymerase (RNA) III (DNA directed) polypeptide H (22.9kD)
novel_NIR_24881	chr22	44732391	44736772	+	44732391;44735162	44735027;44736772	ES	ENST00000611394.4	novel	0.4	22	33.5	22	11;56	y	0.43	17	22.5	17	25;20	y	0.11	5	39	5	48;30	n	0.14	7	43	7	34;52	n	0.00530821	-13.6707	down	ENSG00000186654.20	PRR5	chr22	protein_coding	proline rich 5 (renal)
novel_NIR_25085	chr3	100335112	100339087	+	100334798	100339087	A5SS	ENST00000394140.8	novel	0.15	18	101	18	101	y	0.16	20	104	20	104	y	0	0	162	0	162	n	0.03	4	131	4	131	n	0.0468821	-8.85438	down	ENSG00000114021.11	NIT2	chr3	protein_coding	nitrilase family, member 2
novel_NIR_25626	chr3	140963227;140967036	140966913;140970927	+	140963227	140970927	cassetteExon	ENST00000446041.6	novel	0	0	14	0;0	14	n	0.07	1.5	19	0;3	19	n	0.31	25	55	0;50	55	n	0.34	20	38	4;36	38	y	0.0447203	7.61577	up	ENSG00000114120.11	SLC25A36	chr3	protein_coding	solute carrier family 25 (pyrimidine nucleotide carrier), member 36
novel_NIR_25627	chr3	140963227;140967036	140966934;140970927	+	140963227	140970927	cassetteExon	ENST00000446041.6	novel	0	0	14	0;0	14	n	0.07	1.5	19	0;3	19	n	0.38	33.5	55	17;50	55	y	0.41	26.5	38	17;36	38	y	0.0334886	9.45406	up	ENSG00000114120.11	SLC25A36	chr3	protein_coding	solute carrier family 25 (pyrimidine nucleotide carrier), member 36
novel_NIR_25628	chr3	140963227;140967036	140967000;140970927	+	140963227	140970927	cassetteExon	ENST00000446041.6	novel	0	0	14	0;0	14	n	0.07	1.5	19	0;3	19	n	0.36	31.5	55	13;50	55	y	0.33	19	38	2;36	38	y	0.040911	8.141	up	ENSG00000114120.11	SLC25A36	chr3	protein_coding	solute carrier family 25 (pyrimidine nucleotide carrier), member 36
novel_NIR_25979	chr3	183698210	183715144	+	183697993	183715144	A5SS	ENST00000305135.9	novel	0.07	4	56	4	56	n	0.08	4	45	4	45	n	0.17	7	33	7	33	y	0.18	14	63	14	63	y	0.00496281	14.1421	up	ENSG00000163872.15	YEATS2	chr3	protein_coding	YEATS domain containing 2
novel_NIR_26449	chr3	47281195	47282495	-	47277379	47282495	A3SS	ENST00000335044.6	novel	0	0	41	0	41	n	0.06	2	29	2	29	n	0.43	12	16	12	16	y	0.33	9	18	9	18	y	0.04179	6.00245	up	ENSG00000088727.12	KIF9	chr3	protein_coding	kinesin family member 9
novel_NIR_26682	chr3	49476900	49510419	+	49469055	49510419	A5SS	ENST00000515359.6	novel	0.02	2	103	2	103	n	0.05	2	41	2	41	n	0.26	15	42	15	42	y	0.21	19	71	19	71	n	0.0337883	6.85994	up	ENSG00000173402.11	DAG1	chr3	protein_coding	dystroglycan 1 (dystrophin-associated glycoprotein 1)
novel_NIR_28411	chr5	133270663	133312654	-	133249576	133312654	A3SS	ENST00000265342.11	novel	0.21	34	129	34	129	y	0.19	16	70	16	70	y	0.41	55	78	55	78	y	0.42	53	73	53	73	y	0.00960498	19.2302	up	ENSG00000053108.16	FSTL4	chr5	protein_coding	follistatin-like 4
novel_NIR_28453	chr5	134738792	134750759	+	134738792;134744052	134743987;134750759	ES	ENST00000514518.1	novel	0.05	2	41.5	2	6;77	n	0	0	44.5	0	7;82	n	0.29	15	37.5	15	18;57	y	0.23	8	27	8	0;54	y	0.0285923	6.01773	up	ENSG00000164615.4	CAMLG	chr5	protein_coding	calcium modulating ligand
novel_NIR_29124	chr5	180851493	180860528	-	180851493	180861219	A5SS	ENST00000502412.1	novel	0	0	6	0	6	n	0.11	2	16	2	16	n	1	10	0	10	0	y	0.88	7	1	7	1	n	0.00857409	10.873	up	ENSG00000196670.13	ZFP62	chr5	protein_coding	ZFP62 zinc finger protein
novel_NIR_29127	chr5	180851493;180860654	180860528;180861219	-	180851493	180861219	cassetteExon	ENST00000502412.1	novel	0	0	6	0;0	6	n	0.06	1	16	2;0	16	n	1	5	0	10;0	0	n	0.83	5	1	7;3	1	y	0.0393402	9.81819	up	ENSG00000196670.13	ZFP62	chr5	protein_coding	ZFP62 zinc finger protein
novel_NIR_29318	chr5	413433	418694	+	413433	422729	A3SS	ENST00000505113.5	novel	0	0	70	0	70	n	0.05	2	37	2	37	n	0.23	12	40	12	40	y	0.19	14	59	14	59	y	0.0318977	5.77843	up	ENSG00000063438.16	AHRR	chr5	protein_coding	aryl-hydrocarbon receptor repressor
novel_NIR_29326	chr5	420216	422729	+	421340	422729	5pMXE	ENST00000506456.1	novel	0.8	16	4	16	4	y	0.69	11	5	11	5	y	0.33	6	12	6	12	y	0.41	15	22	15	22	y	0.0381463	-5.51411	down	ENSG00000063438.16	AHRR	chr5	protein_coding	aryl-hydrocarbon receptor repressor
novel_NIR_29845	chr5	94912976	94940084	-	94912976;94931991	94931953;94940084	ES	ENST00000429576.6	novel	0.8	10	2.5	10	5;0	y	0.77	33	10	33	4;16	y	0.62	26	16	26	4;28	y	0.63	33	19.5	33	17;22	y	0.0398973	-10.1193	down	ENSG00000175471.19	MCTP1	chr5	protein_coding	multiple C2 domains, transmembrane 1
novel_NIR_29895	chr6	105288894;105323111	105323006;105323665	-	105288894	105323665	cassetteExon	ENST00000369110.7	novel	0.07	6.5	91	0;13	91	n	0.09	11	112	0;22	112	n	0.21	17.5	64	2;33	64	y	0.18	31.5	146	0;63	146	n	0.0329611	6.37905	up	ENSG00000085377.13	PREP	chr6	protein_coding	prolyl endopeptidase
novel_NIR_29896	chr6	105323111	105323665	-	105288894	105323665	A3SS	ENST00000369110.7	novel	0.12	13	91	13	91	n	0.16	22	112	22	112	y	0.34	33	64	33	64	n	0.3	63	146	63	146	y	0.0238129	6.36396	up	ENSG00000085377.13	PREP	chr6	protein_coding	prolyl endopeptidase
novel_NIR_29977	chr6	112081207	112086556	-	112081207;112084246	112084189;112086556	ES	ENST00000368662.9	novel	0	0	30	0	36;24	n	0.09	5	49.5	5	51;48	n	0.42	15	21	15	24;18	y	0.36	21	38	21	46;30	y	0.0329611	6.37905	up	ENSG00000074935.13	TUBE1	chr6	protein_coding	tubulin, epsilon 1
novel_NIR_30007	chr6	116571655;116572985	116572858;116574058	+	116571655	116574058	cassetteExon	ENST00000487832.6	novel	0.36	14	25	13;15	25	y	0.39	9	14	7;11	14	y	0.07	2	28	0;4	28	n	0.14	3.5	21	3;4	21	n	0.0491861	-7.09055	down	ENSG00000111832.12	RWDD1	chr6	protein_coding	RWD domain containing 1
novel_NIR_30235	chr6	150905761	150912668	+	150905761	150918577	A3SS	ENST00000367321.7	novel	0.04	5	130	5	130	n	0.06	10	148	10	148	n	0.17	32	156	32	156	y	0.15	28	161	28	161	y	0.0161301	7.77817	up	ENSG00000120254.15	MTHFD1L	chr6	protein_coding	methylenetetrahydrofolate dehydrogenase (NADP+ dependent) 1-like
novel_NIR_30376	chr6	16739918	16753233	-	16657901	16753233	A3SS	ENST00000244769.8	novel	0.07	3	38	3	38	n	0.17	2	10	2	10	y	0.48	22	24	22	24	y	0.4	24	36	24	36	y	0.0415403	4.99756	up	ENSG00000124788.17	ATXN1	chr6	protein_coding	ataxin 1
novel_NIR_30526	chr6	28126921	28129372	+	28126921	28129430	A3SS	ENST00000340487.4	novel	0.61	14	9	14	9	y	0.52	16	15	16	15	y	0.14	4	24	4	24	n	0	0	1	0	1	n	0.0388252	-5.94833	down	ENSG00000196812.4	ZSCAN16	chr6	protein_coding	zinc finger and SCAN domain containing 16
novel_NIR_30629	chr6	30326092	30326354	-	30296237	30326354	A3SS	ENST00000438412.5	novel	0.65	28	15	28	15	y	0.5	22	22	22	22	y	0	0	26	0	26	n	0.11	6	51	6	51	n	0.0368986	-5.59107	down	ENSG00000231074.8	HCG18	chr6	antisense	HLA complex group 18 (non-protein coding)
novel_NIR_30661	chr6	30717083	30717245	-	30715178	30717245	A3SS	ENST00000376406.7	novel	0.02	1	46	1	46	n	0	0	35	0	35	n	0.22	4	14	4	14	y	0.2	11	44	11	44	n	0.00496281	14.1421	up	ENSG00000137337.14	MDC1	chr6	protein_coding	mediator of DNA-damage checkpoint 1
novel_NIR_30739	chr6	31817559	31835411	+	31834768	31835411	5pMXE	ENST00000375641.6	novel	1	123	0	123	0	y	0.99	96	1	96	1	y	0.9	175	19	175	19	y	0.89	110	13	110	13	y	0.00496281	-14.1421	down	ENSG00000204387.12	C6orf48	chr6	protein_coding	chromosome 6 open reading frame 48
novel_NIR_31211	chr6	7108702	7176655	+	7108060	7176655	A5SS	ENST00000379938.6	novel	0.4	21	31	21	31	y	0.45	10	12	10	12	y	0.07	4	51	4	51	n	0.14	4	24	4	24	n	0.0230171	-7.43985	down	ENSG00000124782.19	RREB1	chr6	protein_coding	ras responsive element binding protein 1
novel_NIR_31381	chr7	100353123	100355143	+	100353123;100353270	100353210;100355143	ES	ENST00000448382.5	novel	0.67	30	14.5	30	24;5	y	0.73	49	18	49	26;10	y	0.52	40	37.5	40	51;24	y	0.45	39	48.5	39	81;16	y	0.0449627	-4.664	down	ENSG00000121716.18	PILRB	chr7	protein_coding	paired immunoglobin-like type 2 receptor beta
novel_NIR_31383	chr7	100353123;100354012	100353895;100355143	+	100353123;100353270	100353210;100355143	MXE	ENST00000448382.5	novel	0.53	16.5	14.5	0;33	24;5	n	0.51	19	18	5;33	26;10	y	0.4	25.5	37.5	0;51	51;24	n	0.43	37	48.5	0;74	81;16	n	0.0384207	-5.82435	down	ENSG00000121716.18	PILRB	chr7	protein_coding	paired immunoglobin-like type 2 receptor beta
novel_NIR_31432	chr7	100867606	100867911	+	100867606	100868108	A3SS	ENST00000619988.4	novel	0.49	47	48	47	48	n	0.5	59	59	59	59	y	0.1	4	38	4	38	n	0.08	3	36	3	36	n	0.0037906	-36.2243	down	ENSG00000087077.11	TRIP6	chr7	protein_coding	thyroid hormone receptor interactor 6
novel_NIR_31480	chr7	102433661	102436184	+	102433661	102438944	A3SS	ENST00000611770.4	novel	0	0	3	0	3	n	0.1	4	37	4	37	n	0.64	14	8	14	8	n	0.8	8	2	8	2	y	0.0301407	7.10199	up	ENSG00000160991.15	ORAI2	chr7	protein_coding	ORAI calcium release-activated calcium modulator 2
novel_NIR_31650	chr7	116672577;116695799	116695750;116699071	+	116672577	116699071	cassetteExon	ENST00000397752.7	novel	0.24	32	103	28;36	103	y	0.27	48	132	38;58	132	y	0.07	15.5	193	7;24	193	n	0.08	17.5	213	18;17	213	n	0.0345951	-11.3842	down	ENSG00000105976.14	MET	chr7	protein_coding	MET proto-oncogene, receptor tyrosine kinase
novel_NIR_31659	chr7	117209937	117229762	+	117222062	117229762	A5SS&ES	ENST00000393449.5	novel	0.2	1	4	1	4	n	0.23	7	24	7	24	y	0	0	50	0	50	n	0.05	2	40	2	40	n	0.0366694	-6.51695	down	ENSG00000004866.18	ST7	chr7	protein_coding	suppression of tumorigenicity 7
novel_NIR_32944	chr7	75425708	75437515	-	75425708;75426453	75426362;75437515	ES	ENST00000615331.4	novel	0.04	6	145	6	151;139	n	0	0	81	0	99;63	n	0.17	13	63	13	62;64	y	0.13	25	171	25	148;194	n	0.044221	4.59619	up	ENSG00000272391.5	POM121C	chr7	protein_coding	POM121 transmembrane nucleoporin C
novel_NIR_32993	chr7	76463709	76470214	+	76463709	76480421	A3SS	ENST00000430490.6	novel	0.22	11	40	11	40	y	0.25	4	12	4	12	y	0	0	43	0	43	n	0.04	1	27	1	27	n	0.0165861	-8.6	down	ENSG00000091073.19	DTX2	chr7	protein_coding	deltex 2, E3 ubiquitin ligase
novel_NIR_33948	chr8	144851395	144852380	-	144851395	144852993	A5SS	ENST00000402718.4	novel	0.36	28	49	28	49	y	0.45	15	18	15	18	y	0	0	60	0	60	n	0.06	2	30	2	30	n	0.0286201	-6.93375	down	ENSG00000170619.9	COMMD5	chr8	protein_coding	COMM domain containing 5
novel_NIR_34913	chr9	122264938;122265545	122265462;122270864	+	122264938	122270864	cassetteExon	ENST00000297908.7	novel	0.12	15	108	26;4	108	n	0.11	27	208	29;25	208	n	0.19	43.5	181	27;60	181	y	0.21	26	99	28;24	99	y	0.037184	7.60263	up	ENSG00000148187.17	MRRF	chr9	protein_coding	mitochondrial ribosome recycling factor
novel_NIR_35369	chr9	136477684	136482920	-	136477684	136483510	A5SS	ENST00000290037.10	novel	0.31	12	27	12	27	y	0.28	5	13	5	13	y	0	0	8	0	8	n	0.06	2	32	2	32	n	0.0351729	-7.90077	down	ENSG00000148396.18	SEC16A	chr9	protein_coding	SEC16 homolog A (S. cerevisiae)
novel_NIR_35778	chr9	39078456	39085736	-	39078456;39078920	39078690;39085736	ES	ENST00000297668.10	novel	0	0	4.5	0	0;9	n	0.15	2	11.5	2	2;21	y	0.59	11	7.5	11	7;8	y	0.8	4	1	4	2;0	y	0.049324	4.8049	up	ENSG00000106714.17	CNTNAP3	chr9	protein_coding	contactin associated protein-like 3
novel_NIR_35848	chr9	540667	549190	+	540667	676890	A3SS	ENST00000382303.5	novel	0.63	17	10	17	10	y	0.78	14	4	14	4	y	0.3	10	23	10	23	y	0.18	9	42	9	42	y	0.0439884	-4.84139	down	ENSG00000107104.18	KANK1	chr9	protein_coding	KN motif and ankyrin repeat domains 1
novel_NIR_35979	chr9	81634301	81652184	-	81634301	81652214	A5SS	ENST00000376499.7	novel	0.33	58	116	58	116	y	0.38	42	70	42	70	y	0.13	17	115	17	115	n	0.17	25	124	25	124	y	0.0264129	-6.40312	down	ENSG00000196781.13	TLE1	chr9	protein_coding	transducin-like enhancer of split 1 (E(sp1) homolog, Drosophila)
novel_NIR_36320	chrX	104188177	104189608	+	104188306	104189608	A5SS	ENST00000493442.1	novel	0.06	4	63	4	63	n	0	0	106	0	106	n	0.31	44	96	44	96	y	0.27	28	76	28	76	y	0.026775	7.2111	up	ENSG00000123575.8	FAM199X	chrX	protein_coding	family with sequence similarity 199, X-linked
novel_NIR_36481	chrX	130074141	130074555	-	130074141	130074581	A5SS	ENST00000335997.11	novel	0.14	5	32	5	32	n	0.18	12	54	12	54	y	0	0	60	0	60	n	0.03	3	95	3	95	n	0.033757	-5.8	down	ENSG00000102034.16	ELF4	chrX	protein_coding	E74-like factor 4 (ets domain transcription factor)
novel_NIR_36834	chrX	15745710	15749971	+	15738352	15749971	A5SS	ENST00000318636.7	novel	0.19	6	26	6	26	n	0.18	3	14	3	14	y	0	0	61	0	61	n	0.02	2	91	2	91	n	0.012987	-15.6525	down	ENSG00000169239.12	CA5B	chrX	protein_coding	carbonic anhydrase VB, mitochondrial

## Sheet: RAS_IR
ID	Chr	Ass1	Ass2	Strand	Type	Isoform	KorN	shCtrl_1st.Ratio	shCtrl_1st.intron_ave_base	shCtrl_1st.ends_exon_ave_base	shCtrl_1st.isfiltered	shCtrl_2nd.Ratio	shCtrl_2nd.intron_ave_base	shCtrl_2nd.ends_exon_ave_base	shCtrl_2nd.isfiltered	shFLNB_1st.Ratio	shFLNB_1st.intron_ave_base	shFLNB_1st.ends_exon_ave_base	shFLNB_1st.isfiltered	shFLNB_2nd.Ratio	shFLNB_2nd.intron_ave_base	shFLNB_2nd.ends_exon_ave_base	shFLNB_2nd.isfiltered	Pvalue	Tvalue	DiffType	Gene	Symbol	Chr	GeneType	Description
known_IR_160	chr10	73792490	73792590	+	IntronR	ENST00000603114.5	known	1.09	43.99	40.26	y	1.48	42.15	28.42	y	2.81	59.6	21.2	y	2.49	82.23	33.04	y	0.0352252	5.41151	up	ENSG00000214655.10	ZSWIM8	chr10	protein_coding	zinc finger, SWIM-type containing 8
known_IR_190	chr11	130231715	130233308	-	IntronR	ENST00000397753.5	known	0.18	4.95	26.82	n	0.22	6.11	27.6	y	0.5	14.25	28.61	y	0.45	9.62	21.39	y	0.0152953	8.58956	up	ENSG00000196323.11	ZBTB44	chr11	protein_coding	zinc finger and BTB domain containing 44
known_IR_238	chr11	65499462	65500912	+	IntronR	ENST00000544868.2	known	0.61	24.81	40.39	y	0.68	30.28	44.62	y	0.96	118.54	122.93	y	1	79.56	79.8	y	0.0268193	8.31033	up	ENSG00000251562.7	MALAT1	chr11	lincRNA	metastasis associated lung adenocarcinoma transcript 1 (non-protein coding)
known_IR_511	chr16	28711567	28711657	+	IntronR	ENST00000395587.5	known	1.06	57.08	53.79	y	0.99	57.92	58.74	y	1.72	56.92	33.12	y	1.76	108.57	61.52	y	0.00811517	17.737	up	ENSG00000184110.14	EIF3C	chr16	protein_coding	eukaryotic translation initiation factor 3, subunit C
known_IR_617	chr17	29930040	29930159	-	IntronR	ENST00000582084.1	known	1.13	5.69	5.05	y	1.25	6.05	4.83	y	0.49	3.08	6.28	y	0.43	9.31	21.75	y	0.0220912	-10.8822	down	ENSG00000141298.17	SSH2	chr17	protein_coding	slingshot protein phosphatase 2
known_IR_700	chr17	78997644	78997840	-	IntronR	ENST00000392446.9	known	0.43	45.57	104.86	y	0.41	39.91	97.74	y	0.29	29.06	99.77	y	0.26	32.57	124.04	y	0.0222268	-8.04315	down	ENSG00000171302.16	CANT1	chr17	protein_coding	calcium activated nucleotidase 1
known_IR_721	chr18	12325100	12325183	+	IntronR	ENST00000591208.1	known	1.15	329.66	285.55	y	1.22	302.46	248.52	y	0.92	276.3	299.56	y	0.98	276.93	283.04	y	0.038166	-5.09787	down	ENSG00000176014.12	TUBB6	chr18	protein_coding	tubulin, beta 6 class V
known_IR_733	chr19	1105402	1105406	+	IntronR	ENST00000616066.4	known	1.04	685.67	657.99	y	1.03	637.33	616.67	y	0.99	619.33	623.63	y	1	610.33	609.46	y	0.0298575	-5.65685	down	ENSG00000167468.16	GPX4	chr19	protein_coding	glutathione peroxidase 4
known_IR_737	chr19	1244440	1244737	+	IntronR	ENST00000395633.5	known	1.08	266.78	246.09	y	1.09	302.62	278.45	y	1	224.19	224.56	y	1.01	220.86	219.56	y	0.00772212	-11.3137	down	ENSG00000099624.7	ATP5D	chr19	protein_coding	ATP synthase, H+ transporting, mitochondrial F1 complex, delta subunit
known_IR_795	chr19	40072649	40072837	-	IntronR	ENST00000414720.6	known	0.18	0.31	1.76	n	0.04	0.1	2.4	n	1.08	5.63	5.21	y	1.26	2.63	2.09	y	0.0136746	9.29682	up	ENSG00000197782.14	ZNF780A	chr19	protein_coding	zinc finger protein 780A
known_IR_841	chr19	55083519	55083616	+	IntronR	ENST00000201647.10	known	0.17	3.28	19.09	n	0.21	5.26	24.51	y	0	0	25.68	n	0.02	0.41	17.09	n	0.0342344	-8.04984	down	ENSG00000131037.14	EPS8L1	chr19	protein_coding	EPS8-like 1
known_IR_911	chr2	232581304	232581984	-	IntronR	ENST00000415506.6	known	0.78	11.2	14.34	y	0.73	17.11	23.42	y	0.95	20.28	21.37	y	0.91	24.3	26.73	y	0.0353057	5.46608	up	ENSG00000237126.8	AC073254.1	chr2	antisense		--
known_IR_918	chr2	272065	272192	+	IntronR	ENST00000405233.5	known	16.2	166.76	10.29	y	15.45	183.34	11.86	y	12.95	162.57	12.55	y	13.64	162.83	11.94	y	0.0387888	-4.96508	down	ENSG00000143727.15	ACP1	chr2	protein_coding	acid phosphatase 1, soluble
known_IR_922	chr2	38602600	38602857	-	IntronR	ENST00000409636.5	known	1.13	45.59	40.35	y	1.03	51.95	50.5	y	2.07	95.2	45.98	y	2.25	70.82	31.45	y	0.0195515	10.4899	up	ENSG00000143889.15	HNRNPLL	chr2	protein_coding	heterogeneous nuclear ribonucleoprotein L-like
known_IR_991	chr21	39194751	39196498	-	IntronR	ENST00000380800.7	known	0.46	1.16	2.52	y	0.41	1.27	3.13	y	0.64	7.04	11.04	y	0.61	3.08	5.05	y	0.0366694	6.51695	up	ENSG00000185658.13	BRWD1	chr21	protein_coding	bromodomain and WD repeat domain containing 1
known_IR_1144	chr4	2938188	2938812	-	IntronR	ENST00000314262.10	known	0.89	27.71	31.2	y	0.88	26.75	30.35	y	0.5	20.79	41.58	y	0.54	21.69	40.27	y	0.0258473	-17.7051	down	ENSG00000087269.15	NOP14	chr4	protein_coding	NOP14 nucleolar protein
known_IR_1181	chr5	149845914	149847458	+	IntronR	ENST00000309241.9	known	0.72	1.86	2.6	n	0.66	1.14	1.73	n	0.25	0.97	3.86	n	0.24	1.09	4.49	y	0.0378657	-14.6315	down	ENSG00000155846.16	PPARGC1B	chr5	protein_coding	peroxisome proliferator-activated receptor gamma, coactivator 1 beta
known_IR_1260	chr6	33200938	33201242	+	IntronR	ENST00000374675.7	known	1.02	336.12	329.06	y	1	365.4	363.71	y	1.1	416.73	379.26	y	1.09	545.58	501.44	y	0.037184	7.60263	up	ENSG00000112473.16	SLC39A7	chr6	protein_coding	solute carrier family 39 (zinc transporter), member 7
known_IR_1271	chr6	36968949	36968951	-	IntronR	ENST00000538808.5	known	1.66	623	376.18	y	1.63	663	406.36	y	1.42	628	441.33	y	1.45	647	446.67	y	0.0100505	-9.89949	down	ENSG00000137409.18	MTCH1	chr6	protein_coding	mitochondrial carrier 1
known_IR_1304	chr7	148754009	148754082	+	IntronR	ENST00000617797.1	known	1.06	41.92	39.46	y	1.04	70.28	67.4	y	0.74	39.22	52.99	y	0.67	49.33	74.05	y	0.0482854	-9.47788	down	ENSG00000055130.15	CUL1	chr7	protein_coding	cullin 1
known_IR_1383	chr8	43085458	43085582	+	IntronR	ENST00000529687.5	known	1.49	73.58	49.5	y	1.55	93.67	60.54	y	1.17	110.57	94.36	y	1.24	93.14	75.21	y	0.0220315	-6.83331	down	ENSG00000168522.12	FNTA	chr8	protein_coding	farnesyltransferase, CAAX box, alpha
known_IR_1397	chr9	127451669	127451929	+	IntronR	ENST00000300417.10	known	0.24	12.02	50.81	y	0.2	8.47	42.95	n	0.37	17.27	46.85	y	0.39	21.86	56.04	y	0.0405833	7.15542	up	ENSG00000148356.13	LRSAM1	chr9	protein_coding	leucine rich repeat and sterile alpha motif containing 1
known_IR_1466	chrX	154485462	154485603	-	IntronR	ENST00000369653.8	known	0.67	115.76	173.12	y	0.74	147.06	198.9	y	1.04	174.98	167.71	y	0.97	166.76	172.39	y	0.0261588	6.06092	up	ENSG00000102178.12	UBL4A	chrX	protein_coding	ubiquitin-like 4A
novel_IR_50	chr1	110049238	110049460	+	IntronR	ENST00000369796.5	novel	0.05	0.89	18.77	n	0	0	40.58	n	0.22	7.32	32.93	y	0.17	6.46	37.07	n	0.0406345	4.80833	up	ENSG00000143093.14	STRIP1	chr1	protein_coding	striatin interacting protein 1
novel_IR_158	chr1	146066561	146067180	-	IntronR	ENST00000583866.8	novel	0.47	4.01	8.49	y	0.44	2.77	6.33	y	0.26	4	15.68	y	0.22	3.79	17.03	n	0.0165861	-8.6	down	ENSG00000271425.6	NBPF10	chr1	protein_coding	neuroblastoma breakpoint family, member 10
novel_IR_205	chr1	150556684	150557693	-	IntronR	ENST00000442435.3	novel	1.52	10.58	6.98	y	1.44	5.23	3.62	n	0.64	7.66	11.97	y	0.7	10.11	14.47	n	0.00518792	-16.2	down	ENSG00000237781.3	RP11-54A4.2	chr1	antisense		--
novel_IR_207	chr1	150557623	150557945	+	IntronR	ENST00000369039.9	novel	0.02	0.63	28.39	n	0	0	4.16	n	0.3	5.75	19.33	y	0.28	3.7	13.03	y	0.0025413	19.799	up	ENSG00000143382.13	ADAMTSL4	chr1	protein_coding	ADAMTS-like 4
novel_IR_240	chr1	153535933	153536108	-	IntronR	ENST00000368720.6	novel	15.31	590.09	38.53	y	17.29	633.79	36.65	y	24.4	461.13	18.9	y	26.44	517.9	19.59	y	0.0234935	6.41602	up	ENSG00000197956.9	S100A6	chr1	protein_coding	S100 calcium binding protein A6
novel_IR_290	chr1	155318005	155318265	-	IntronR	ENST00000443642.1	novel	0.77	364.14	472.82	y	0.74	357.47	481.52	y	0.88	448.02	509.7	y	0.86	443.32	518.42	y	0.0329611	6.37905	up	ENSG00000225855.6	RUSC1-AS1	chr1	antisense	RUSC1 antisense RNA 1
novel_IR_356	chr1	160098517	160098799	-	IntronR	ENST00000614243.4	novel	0.16	5.18	33.35	n	0.12	3.77	30.41	n	0.31	7.28	23.29	y	0.34	8.67	25.23	y	0.0217889	7.4	up	ENSG00000162729.13	IGSF8	chr1	protein_coding	immunoglobulin superfamily, member 8
novel_IR_528	chr1	209779374	209780470	+	IntronR	ENST00000367025.7	novel	0.22	0.49	2.24	n	0.07	0.17	2.53	n	1.52	5.27	3.47	y	1.21	3.73	3.08	y	0.0428831	7.08512	up	ENSG00000009790.14	TRAF3IP3	chr1	protein_coding	TRAF3 interacting protein 3
novel_IR_529	chr1	209779374	209780470	+	IntronR	ENST00000367026.7	novel	0.22	0.49	2.24	y	0.07	0.17	2.53	n	1.52	5.27	3.47	n	1.21	3.73	3.08	n	0.0428831	7.08512	up	ENSG00000009790.14	TRAF3IP3	chr1	protein_coding	TRAF3 interacting protein 3
novel_IR_780	chr1	39764732	39764849	-	IntronR	ENST00000397360.2	novel	1.88	8.23	4.38	y	2.36	1.28	0.54	n	0	0	3.81	n	0.57	2.64	4.6	y	0.0411202	-4.92495	down	ENSG00000116985.10	BMP8B	chr1	protein_coding	bone morphogenetic protein 8b
novel_IR_787	chr1	40477894	40479333	+	IntronR	ENST00000372705.3	novel	0.79	1.53	1.93	n	0.65	1.22	1.87	y	0.05	0.47	9	n	0.17	0.7	4.16	n	0.0234193	-6.61638	down	ENSG00000187815.9	ZFP69	chr1	protein_coding	ZFP69 zinc finger protein
novel_IR_875	chr1	50969899	50970358	+	IntronR	ENST00000262662.5	novel	0.33	9.16	27.96	y	0.27	8.5	31.85	y	0.61	17.75	29.26	y	0.59	18.75	32.01	y	0.0431348	9.48683	up	ENSG00000123080.10	CDKN2C	chr1	protein_coding	cyclin-dependent kinase inhibitor 2C (p18, inhibits CDK4)
novel_IR_947	chr1	8324726	8325298	+	IntronR	ENST00000471889.5	novel	2.43	0.75	0.31	y	2.99	0.71	0.24	n	0.62	1.33	2.15	y	0	0	0.82	n	0.0296685	-5.74531	down	ENSG00000162426.14	SLC45A1	chr1	protein_coding	solute carrier family 45, member 1
novel_IR_1013	chr10	100979018	100979102	+	IntronR	ENST00000370250.8	novel	1.38	4.59	3.32	y	1.39	3	2.16	y	2.2	17.82	8.09	y	2.26	10.29	4.54	y	0.019268	27.7834	up	ENSG00000095539.15	SEMA4G	chr10	protein_coding	sema domain, immunoglobulin domain (Ig), transmembrane domain (TM) and short cytoplasmic domain, (semaphorin) 4G
novel_IR_1018	chr10	100981229	100983305	+	IntronR	ENST00000370250.8	novel	0.69	6.01	8.71	n	0.57	4.83	8.43	y	1.14	8.32	7.28	y	1.26	9.42	7.49	y	0.0214502	6.71751	up	ENSG00000095539.15	SEMA4G	chr10	protein_coding	sema domain, immunoglobulin domain (Ig), transmembrane domain (TM) and short cytoplasmic domain, (semaphorin) 4G
novel_IR_1358	chr11	117290659	117290900	-	IntronR	ENST00000313005.10	novel	0.03	1.93	55.99	n	0	0	19.48	n	0.35	6.86	19.86	y	0.29	9.25	31.75	y	0.0286887	9.09334	up	ENSG00000186318.16	BACE1	chr11	protein_coding	beta-site APP-cleaving enzyme 1
novel_IR_1483	chr11	313691	314164	+	IntronR	ENST00000528780.5	novel	0.57	0.74	1.28	n	0.49	1.5	3.09	n	0.27	1.02	3.83	y	0.19	0.67	3.51	n	0.0337651	-5.3033	down	ENSG00000185885.15	IFITM1	chr11	protein_coding	interferon induced transmembrane protein 1
novel_IR_1734	chr11	66335251	66335407	-	IntronR	ENST00000311320.8	novel	0.05	4.82	94.38	n	0.09	8.56	96.49	n	0.2	12.72	64.99	n	0.22	16.23	73.58	y	0.0491686	6.26099	up	ENSG00000174791.10	RIN1	chr11	protein_coding	Ras and Rab interactor 1
novel_IR_1812	chr11	73308564	73308672	-	IntronR	ENST00000546324.1	novel	1.96	19.35	9.88	y	2.6	14.78	5.67	y	0	0	5.44	n	0.36	1.64	4.62	y	0.0488151	-5.71971	down	ENSG00000257038.1	RP11-800A3.7	chr11	antisense		--
novel_IR_1902	chr11	96390073	96390483	+	IntronR	ENST00000332349.4	novel	0.2	2.57	13.15	n	0.28	3.81	13.38	y	0.63	16.77	26.71	y	0.66	15.01	22.79	y	0.0387547	9.48033	up	ENSG00000183340.6	JRKL	chr11	protein_coding	JRK-like
novel_IR_2000	chr12	122483344	122483460	-	IntronR	ENST00000633063.1	novel	0	0	20.75	n	0.05	0.89	16.71	n	0.38	20.73	54.99	y	0.32	14.76	46.15	y	0.0155313	8.3224	up	ENSG00000033030.13	ZCCHC8	chr12	protein_coding	zinc finger, CCHC domain containing 8
novel_IR_2076	chr12	30715081	30716508	-	IntronR	ENST00000395805.6	novel	0.2	0.51	2.52	n	0.23	1.33	5.85	n	0.4	3.62	9.02	y	0.38	1.53	4.02	n	0.016102	9.70725	up	ENSG00000110888.17	CAPRIN2	chr12	protein_coding	caprin family member 2
novel_IR_2161	chr12	52252481	52253213	-	IntronR	ENST00000534226.5	novel	0.23	1.78	7.65	n	0.5	2.21	4.42	n	2.03	7.18	3.53	n	1.76	7.83	4.44	y	0.0152164	8.01388	up	ENSG00000135477.11	KRT87P	chr12	transcribed_unprocessed_pseudogene	keratin 87 pseudogene
novel_IR_2251	chr12	56350190	56350412	-	IntronR	ENST00000314128.8	novel	0	0	2.91	n	0.13	0.51	3.98	n	0.54	2.04	3.77	y	0.41	4.47	10.91	y	0.0467694	4.46021	up	ENSG00000170581.13	STAT2	chr12	protein_coding	signal transducer and activator of transcription 2, 113kDa
novel_IR_2276	chr12	57608737	57609077	+	IntronR	ENST00000548804.5	novel	0.05	0.44	8.78	n	0	0	6.01	n	0.35	2.76	7.84	y	0.28	3.22	11.44	y	0.0273792	6.74236	up	ENSG00000178498.15	DTX3	chr12	protein_coding	deltex 3, E3 ubiquitin ligase
novel_IR_2381	chr12	70539014	70539625	-	IntronR	ENST00000334414.10	novel	0.5	3.61	7.18	n	0.45	3.54	7.87	y	0.08	1.43	17.25	n	0.17	2.42	14.46	n	0.0381027	-6.799	down	ENSG00000127329.14	PTPRB	chr12	protein_coding	protein tyrosine phosphatase, receptor type, B
novel_IR_2423	chr12	8776384	8830662	-	IntronR	ENST00000537288.1	novel	0.09	0.12	1.46	n	0.13	0.37	2.9	n	0.52	0.88	1.7	y	0.44	0.5	1.14	y	0.0329028	8.27345	up	ENSG00000256661.1	A2ML1-AS1	chr12	antisense	A2ML1 antisense RNA 1
novel_IR_2435	chr12	916535	916639	-	IntronR	ENST00000539046.5	novel	0.03	0.17	6.57	n	0.15	0.68	4.5	n	0.76	5.36	7.06	y	0.61	4.62	7.55	y	0.0280719	6.19489	up	ENSG00000002016.16	RAD52	chr12	protein_coding	RAD52 homolog (S. cerevisiae)
novel_IR_2440	chr12	9312695	9312875	+	IntronR	ENST00000539757.1	novel	0.22	2.41	11.22	y	0.2	2.45	12.57	n	0.04	0.78	18.25	n	0.01	0.2	25.13	n	0.014634	-10.262	down	ENSG00000111788.10	RP11-22B23.1	chr12	unprocessed_pseudogene		--
novel_IR_2474	chr13	110457356	110457525	-	IntronR	ENST00000458403.2	novel	41.61	152.81	3.67	y	41.76	117.58	2.82	y	42.88	92.74	2.16	y	43.21	158.42	3.67	y	0.0426757	7.50363	up	ENSG00000224821.5	COL4A2-AS2	chr13	antisense	COL4A2 antisense RNA 2
novel_IR_2576	chr14	100280065	100291358	-	IntronR	ENST00000553954.1	novel	0.17	4.43	25.42	n	0.23	3.71	16.13	y	0.41	11.04	27.19	y	0.49	11.71	23.99	y	0.0439076	5	up	ENSG00000259052.1	AL157871.2	chr14	sense_overlapping		--
novel_IR_2590	chr14	102197847	102212520	+	IntronR	ENST00000322340.9	novel	6.82	1.15	0.17	n	6.72	1.61	0.24	n	1.16	1.74	1.5	y	1.23	2.47	2	n	0.000271329	-91.3444	down	ENSG00000140153.17	WDR20	chr14	protein_coding	WD repeat domain 20
novel_IR_2764	chr14	53037073	53038205	+	IntronR	ENST00000556988.1	novel	2.36	0.68	0.29	y	0.65	1.04	1.61	n	11.22	4.6	0.41	y	11.87	2.53	0.21	y	0.0317223	10.9764	up	ENSG00000258985.1	RP11-368P15.3	chr14	antisense		--
novel_IR_3117	chr15	75211435	75212097	-	IntronR	ENST00000563568.1	novel	0.3	12.83	42.5	y	0.31	15.57	50.12	y	0.58	21.07	36.19	y	0.6	25.57	42.33	y	0.00635149	25.4912	up	ENSG00000261779.1	RP11-69H7.3	chr15	antisense		--
novel_IR_3190	chr15	89889140	89903216	-	IntronR	ENST00000398333.7	novel	0.13	5.47	41.57	n	0.12	4.81	41.77	n	0.2	5.59	27.46	y	0.21	6.98	33.95	y	0.00772212	11.3137	up	ENSG00000250021.7	C15orf38-AP3S2	chr15	protein_coding	C15orf38-AP3S2 readthrough
novel_IR_3491	chr16	30572411	30582530	+	IntronR	ENST00000492040.1	novel	0.13	1.09	8.28	n	0.18	1.46	8.12	n	0.38	2.93	7.7	y	0.33	3.26	10.02	y	0.0298575	5.65685	up	ENSG00000239791.1	AC002310.7	chr16	antisense		--
novel_IR_3740	chr16	689650	692305	+	IntronR	ENST00000566927.1	novel	0.51	8.27	16.18	y	0.55	9.49	17.14	y	0.94	6.73	7.18	y	0.96	9.66	10.06	y	0.00994218	18.783	up	ENSG00000261659.2	LA16c-313D11.12	chr16	processed_transcript		--
novel_IR_3760	chr16	70688090	70692821	-	IntronR	ENST00000261776.9	novel	0.22	8.66	38.95	n	0.2	6.64	32.94	y	0.3	11.47	38.43	y	0.33	13.94	42.55	y	0.0384207	5.82435	up	ENSG00000103043.14	VAC14	chr16	protein_coding	Vac14 homolog (S. cerevisiae)
novel_IR_3802	chr16	75476320	75495260	+	IntronR	ENST00000530512.3	novel	1.47	0.57	0.39	y	1.21	0.5	0.41	y	0.11	0.29	2.53	n	0.28	0.84	2.94	y	0.0265302	-7.37177	down	ENSG00000203472.3	RP11-77K12.4	chr16	antisense		--
novel_IR_3960	chr17	1725911	1738291	-	IntronR	ENST00000576540.1	novel	0.31	10.49	33.44	y	0.32	7.33	22.73	y	0.44	8.92	20.46	y	0.42	11.41	26.99	y	0.0239816	10.2859	up	ENSG00000262791.1	RP11-961A15.1	chr17	antisense		--
novel_IR_4104	chr17	37610168	37613764	+	IntronR	ENST00000619099.1	novel	0.58	4.04	7	y	0.56	8.1	14.35	y	0.92	16.09	17.49	y	0.99	13.16	13.29	y	0.0425484	10.5768	up	ENSG00000277688.1	RP11-697E22.1	chr17	antisense		--
novel_IR_4142	chr17	41369724	41382221	-	IntronR	ENST00000620421.1	novel	0.72	4.52	6.26	y	0.87	4.28	4.94	y	3.23	4.43	1.37	y	2.92	3.22	1.1	y	0.0175649	13.2411	up	ENSG00000131738.9	KRT33B	chr17	protein_coding	keratin 33B, type I
novel_IR_4469	chr17	75267630	75268083	-	IntronR	ENST00000580571.5	novel	0.29	8.46	28.74	y	0.23	9.9	42.48	n	0.76	13.03	17.2	y	0.81	11.77	14.59	y	0.00621004	13.4439	up	ENSG00000125457.13	MIF4GD	chr17	protein_coding	MIF4G domain containing
novel_IR_4474	chr17	75521510	75521705	+	IntronR	ENST00000333213.10	novel	0.03	1.22	38.77	n	0	0	40.71	n	0.18	10.44	58.36	n	0.2	10.58	52.13	y	0.016102	9.70725	up	ENSG00000182173.12	TSEN54	chr17	protein_coding	TSEN54 tRNA splicing endonuclease subunit
novel_IR_4509	chr17	75943993	75945075	+	IntronR	ENST00000587348.1	novel	1.41	6.52	4.62	y	1.65	2.93	1.78	y	0.68	8.62	12.67	y	0.55	9.08	16.49	y	0.040254	-6.7046	down	ENSG00000267615.1	RP11-552F3.13	chr17	antisense		--
novel_IR_4560	chr17	78501344	78501742	-	IntronR	ENST00000389840.6	novel	0	0	4.45	n	0.27	2.67	9.87	y	1.17	13.83	11.81	y	1	5.91	5.93	y	0.0397941	5.95497	up	ENSG00000187775.16	DNAH17	chr17	protein_coding	dynein, axonemal, heavy chain 17
novel_IR_4561	chr17	78501344	78501748	-	IntronR	ENST00000585328.5	novel	0	0	4.55	n	0.27	2.7	9.97	y	1.16	13.78	11.84	y	0.98	5.86	6	y	0.0391131	5.76272	up	ENSG00000187775.16	DNAH17	chr17	protein_coding	dynein, axonemal, heavy chain 17
novel_IR_4601	chr17	81115817	81116230	+	IntronR	ENST00000321300.10	novel	27.15	41.36	1.52	y	27.34	29.7	1.09	y	11.09	29.93	2.7	y	8.86	25.13	2.84	y	0.0397011	-15.4329	down	ENSG00000175866.15	BAIAP2	chr17	protein_coding	BAI1-associated protein 2
novel_IR_4893	chr19	12944223	12944324	-	IntronR	ENST00000589120.1	novel	1.79	1626.08	909.63	y	1.88	1740.82	923.73	y	2.37	2835.7	1196.37	y	2.3	3093.58	1347.38	y	0.0152346	8.77058	up	ENSG00000267458.1	CTC-425F1.4	chr19	antisense		--
novel_IR_5340	chr19	45145260	45145353	+	IntronR	ENST00000221462.8	novel	0.04	1.17	27.31	n	0	0	17.11	n	0.48	8.52	17.87	y	0.42	8.68	20.55	y	0.0112934	11.9261	up	ENSG00000104866.10	PPP1R37	chr19	protein_coding	protein phosphatase 1, regulatory subunit 37
novel_IR_5568	chr19	57351359	57351480	-	IntronR	ENST00000597973.1	novel	0.53	0.77	1.44	n	0	0	1.41	n	7.51	10.21	1.36	y	8.02	9.6	1.2	y	0.0024126	20.3935	up	ENSG00000268678.1	CTC-444N24.13	chr19	antisense		--
novel_IR_5587	chr19	58451704	58453187	+	IntronR	ENST00000545523.5	novel	0.51	1.2	2.33	n	0.32	1.28	4.02	n	1.09	0.8	0.74	y	0.94	0.48	0.51	n	0.0426063	4.95715	up	ENSG00000249471.7	ZNF324B	chr19	protein_coding	zinc finger protein 324B
novel_IR_5716	chr2	112586114	112586200	+	IntronR	ENST00000409719.1	novel	0	0.09	20.45	n	0.06	1.2	20.91	n	0.31	4.01	12.98	y	0.36	5.59	15.34	y	0.0175179	7.81025	up	ENSG00000125611.15	CHCHD5	chr2	protein_coding	coiled-coil-helix-coiled-coil-helix domain containing 5
novel_IR_5762	chr2	130341944	130342134	-	IntronR	ENST00000409127.1	novel	0.43	8.86	20.59	n	0.45	9.61	21.23	n	1.82	22.25	12.21	y	1.79	15.71	8.79	y	0.00045458	75.7166	up	ENSG00000136710.9	CCDC115	chr2	protein_coding	coiled-coil domain containing 115
novel_IR_5881	chr2	200609135	200609321	+	IntronR	ENST00000374700.6	novel	0.76	5.82	7.7	y	0.82	3.96	4.8	y	0.39	4.21	10.68	y	0.38	8.35	22.11	y	0.0418085	-13.3163	down	ENSG00000138356.13	AOX1	chr2	protein_coding	aldehyde oxidase 1
novel_IR_5951	chr2	219243631	219245229	-	IntronR	ENST00000392089.6	novel	1	0.28	0	n	1.34	1.56	1.17	n	0	0	3.46	n	0.24	0.8	3.31	y	0.0459098	-5.04598	down	ENSG00000163521.15	GLB1L	chr2	protein_coding	galactosidase, beta 1-like
novel_IR_5952	chr2	219243643	219245229	-	IntronR	ENST00000295759.11	novel	1	0.28	0	n	1.31	1.56	1.19	y	0	0	3.41	n	0.23	0.78	3.34	y	0.0388968	-5.38853	down	ENSG00000163521.15	GLB1L	chr2	protein_coding	galactosidase, beta 1-like
novel_IR_5982	chr2	223965904	223967482	-	IntronR	ENST00000425192.1	novel	1.11	16.01	14.44	y	1.3	16.12	12.4	y	2.86	12.98	4.54	y	2.82	20.84	7.38	y	0.029987	16.8414	up	ENSG00000228802.1	AC073641.2	chr2	antisense		--
novel_IR_6090	chr2	36966345	36966382	-	IntronR	ENST00000379213.3	novel	0.44	4.64	10.55	y	0.34	1.33	3.94	n	1.42	21	14.82	y	1.33	10.25	7.7	y	0.00484226	14.6429	up	ENSG00000115808.11	STRN	chr2	protein_coding	striatin, calmodulin binding protein
novel_IR_6146	chr2	61188709	61188910	-	IntronR	ENST00000398571.6	novel	0.04	0.44	10.26	n	0.06	0.87	14.68	n	0.19	8.9	46.61	n	0.2	4.55	22.61	y	0.0170999	12.9692	up	ENSG00000115464.14	USP34	chr2	protein_coding	ubiquitin specific peptidase 34
novel_IR_6204	chr2	74549583	74550185	-	IntronR	ENST00000264094.7	novel	0	0	4.18	n	0.18	0.24	1.39	n	0.75	2.86	3.8	y	0.57	1.94	3.42	y	0.0464173	4.47834	up	ENSG00000115318.11	LOXL3	chr2	protein_coding	lysyl oxidase-like 3
novel_IR_6353	chr20	36889403	36892862	+	IntronR	ENST00000217320.7	novel	2.89	5.73	1.99	y	3.16	7.3	2.31	y	4.18	13.38	3.2	y	4.01	10.53	2.62	y	0.0327601	6.70718	up	ENSG00000101342.9	TLDC2	chr20	protein_coding	TBC/LysM-associated domain containing 2
novel_IR_6367	chr20	3921869	3923323	-	IntronR	ENST00000619343.1	novel	0.31	1.91	6.09	y	0.23	1.17	5	y	0.6	5.97	10.03	y	0.55	4.95	9.01	y	0.035136	6.46599	up	ENSG00000275582.1	RP4-681N20.5	chr20	antisense		--
novel_IR_6531	chr21	42835033	42836448	-	IntronR	ENST00000431150.1	novel	0.45	0.95	2.13	n	0.49	0.37	0.76	y	1	1.51	0	n	0.97	0.49	0.5	y	0.0033286	20.6	up	ENSG00000225218.1	AP001628.6	chr21	lincRNA		--
novel_IR_6686	chr22	24414744	24433131	+	IntronR	ENST00000358654.2	novel	0.54	1.63	3.05	y	0.53	2.12	4.02	y	0.4	3.19	7.94	y	0.42	3.82	9.12	y	0.0212375	-11.1803	down	ENSG00000258555.4	SPECC1L-ADORA2A	chr22	protein_coding	SPECC1L-ADORA2A readthrough (NMD candidate)
novel_IR_6789	chr22	41527420	41527901	+	IntronR	ENST00000216254.8	novel	0.23	16.54	70.89	y	0.22	18.93	84.26	y	0.18	19.86	111.04	n	0.17	17.59	104.83	n	0.0194193	-7.07107	down	ENSG00000100412.15	ACO2	chr22	protein_coding	aconitase 2, mitochondrial
novel_IR_6841	chr22	50267174	50267257	-	IntronR	ENST00000330651.10	novel	0.19	2.2	11.79	n	0.21	9	41.87	y	0	0	8.87	n	0.04	0.54	14.51	n	0.0342344	-8.04984	down	ENSG00000185386.14	MAPK11	chr22	protein_coding	mitogen-activated protein kinase 11
novel_IR_7008	chr3	15441669	15443403	-	IntronR	ENST00000610011.1	novel	8.06	7.44	0.92	n	6.67	8.34	1.25	y	1.36	11.95	8.77	y	0.87	13.02	15.04	y	0.0471673	-8.48125	down	ENSG00000249786.7	EAF1-AS1	chr3	antisense	EAF1 antisense RNA 1
novel_IR_7013	chr3	156531497	156536658	+	IntronR	ENST00000490337.5	novel	0.65	0.63	0.97	n	0.17	0.06	0.34	n	2.37	2.79	1.18	y	1.99	1.33	0.67	n	0.0321632	5.78234	up	ENSG00000169282.17	KCNAB1	chr3	protein_coding	potassium channel, voltage gated subfamily A regulatory beta subunit 1
novel_IR_7123	chr3	40532206	40538286	+	IntronR	ENST00000310898.5	novel	1.66	6.63	4	n	1.6	7.32	4.57	y	1	17.03	16.98	y	1.03	14.07	13.72	y	0.0102997	-18.3358	down	ENSG00000172888.11	ZNF621	chr3	protein_coding	zinc finger protein 621
novel_IR_7158	chr3	47241015	47244791	-	IntronR	ENST00000444589.6	novel	0.35	0.78	2.23	y	0.29	1.08	3.7	y	0.68	1.34	1.98	n	0.76	1.37	1.81	y	0.0189173	8	up	ENSG00000088727.12	KIF9	chr3	protein_coding	kinesin family member 9
novel_IR_7367	chr3	94061606	94062869	-	IntronR	ENST00000394221.2	novel	0.39	1.36	3.5	y	0.35	0.85	2.42	y	0.08	0.5	6.37	n	0.13	0.56	4.41	n	0.0163929	-8.27721	down	ENSG00000178700.7	DHFRL1	chr3	protein_coding	dihydrofolate reductase-like 1
novel_IR_7492	chr4	2931465	2931825	-	IntronR	ENST00000507555.1	novel	0.39	30.56	77.39	n	0.35	20.38	57.54	y	0.56	27.88	49.36	y	0.51	44.98	88.86	y	0.0392905	5.15373	up	ENSG00000109736.14	MFSD10	chr4	protein_coding	major facilitator superfamily domain containing 10
novel_IR_7494	chr4	2938327	2939535	-	IntronR	ENST00000502735.5	novel	0.86	23.73	27.63	y	0.87	28.84	33.2	y	0.72	29.39	40.79	y	0.73	27.5	37.68	y	0.0025413	-19.799	down	ENSG00000087269.15	NOP14	chr4	protein_coding	NOP14 nucleolar protein
novel_IR_7627	chr5	132754520	132760802	-	IntronR	ENST00000378721.8	novel	1.86	8.03	4.32	n	1.76	10.11	5.75	n	1.03	12.5	12.15	y	1.04	14.02	13.45	n	0.0391787	-15.4231	down	ENSG00000164402.13	SEPT8	chr5	protein_coding	septin 8
novel_IR_7669	chr5	140642419	140642586	+	IntronR	ENST00000394671.7	novel	0.02	0.29	18.66	n	0	0	8.2	n	0.27	3.72	13.88	y	0.28	4.98	17.78	y	0.00706748	23.7023	up	ENSG00000113119.12	TMCO6	chr5	protein_coding	transmembrane and coiled-coil domains 6
novel_IR_7715	chr5	163483272	163493443	-	IntronR	ENST00000521666.1	novel	0.58	2.11	3.67	y	0.63	3.49	5.51	y	1.06	6.71	6.3	y	1.09	4.8	4.43	y	0.00847999	16.1209	up	ENSG00000251018.2	HMMR-AS1	chr5	antisense	HMMR antisense RNA 1
novel_IR_7989	chr6	152380593	152381060	+	IntronR	ENST00000412161.1	novel	0.69	2.54	3.66	y	0.64	1.3	2.03	y	0.27	2.28	8.37	y	0.28	2.22	7.85	y	0.0340047	-15.2971	down	ENSG00000234577.1	SYNE1-AS1	chr6	antisense	SYNE1 antisense RNA 1
novel_IR_8104	chr6	31759177	31759425	+	IntronR	ENST00000375755.7	novel	0.06	0.94	15.04	n	0	0	6.42	n	0.27	2.98	11.03	n	0.2	2.09	10.24	y	0.0490518	4.44707	up	ENSG00000204410.14	MSH5	chr6	protein_coding	mutS homolog 5
novel_IR_8210	chr6	52578393	52578502	+	IntronR	ENST00000605910.1	novel	1.14	3.94	3.47	y	0.96	7.58	7.88	y	0.09	0.69	7.93	n	0	0	1.24	n	0.0250308	-9.98777	down	ENSG00000225791.6	TRAM2-AS1	chr6	lincRNA	TRAM2 antisense RNA 1 (head to head)
novel_IR_8277	chr7	100577005	100577086	-	IntronR	ENST00000310300.10	novel	0	0	42.32	n	0.02	0.96	44.68	n	0.2	3.26	16.28	y	0.21	5	23.92	n	0.0110831	17.4413	up	ENSG00000077454.15	LRCH4	chr7	protein_coding	leucine-rich repeats and calponin homology (CH) domain containing 4
novel_IR_8278	chr7	100577005	100577086	-	IntronR	ENST00000485071.2	novel	0	0	25.54	n	0.04	0.96	24.54	n	0.3	3.26	10.89	n	0.35	5	14.34	y	0.0125956	9.5266	up	ENSG00000274272.1	RP11-44M6.7	chr7	processed_transcript		--
novel_IR_8457	chr7	156654718	156657541	+	IntronR	ENST00000392741.6	novel	0.07	0.24	3.6	n	0.02	0.05	3.38	n	0.58	1.77	3.02	y	0.72	0.87	1.21	y	0.0490688	8.13934	up	ENSG00000105982.16	RNF32	chr7	protein_coding	ring finger protein 32
novel_IR_8461	chr7	156675863	156676419	+	IntronR	ENST00000432459.6	novel	0.13	0.25	1.94	n	0.21	0.7	3.26	y	0.56	2.99	5.34	y	0.59	3.92	6.67	y	0.0387547	9.48033	up	ENSG00000105982.16	RNF32	chr7	protein_coding	ring finger protein 32
novel_IR_8554	chr7	45921028	45921108	-	IntronR	ENST00000615754.4	novel	0.52	267.15	518.64	y	0.51	176.77	344.11	y	0.48	195.9	409.36	y	0.47	218.65	466.19	y	0.0298575	-5.65685	down	ENSG00000146674.14	IGFBP3	chr7	protein_coding	insulin-like growth factor binding protein 3
novel_IR_8911	chr8	30566360	30570637	+	IntronR	ENST00000397323.8	novel	0.02	0.07	3.12	n	0.06	0.1	1.87	n	0.25	1.56	6.22	y	0.19	0.82	4.26	n	0.049697	4.9923	up	ENSG00000157110.15	RBPMS	chr8	protein_coding	RNA binding protein with multiple splicing
novel_IR_8924	chr8	38407463	38408212	+	IntronR	ENST00000297720.9	novel	0.19	0.39	2.03	n	0.09	0.29	3.23	n	0.53	2.48	4.71	y	0.46	1.56	3.43	n	0.0363033	5.81655	up	ENSG00000165046.12	LETM2	chr8	protein_coding	leucine zipper-EF-hand containing transmembrane protein 2
novel_IR_8982	chr9	111728049	111738280	-	IntronR	ENST00000394779.7	novel	1.22	0.27	0.22	n	1	0.26	0	n	0.48	0.32	0.67	n	0.3	0.22	0.74	y	0.0398348	-5.0659	down	ENSG00000165181.16	C9orf84	chr9	protein_coding	chromosome 9 open reading frame 84
novel_IR_9004	chr9	122939382	122940094	+	IntronR	ENST00000561961.2	novel	1.82	1.37	0.75	y	1.87	1.24	0.66	n	1.05	7.32	6.96	y	1.12	3.34	2.99	y	0.00489658	-17.6696	down	ENSG00000261094.2	RP11-355O1.11	chr9	sense_overlapping		--
novel_IR_9031	chr9	127944684	127944777	-	IntronR	ENST00000373095.5	novel	0.24	8.58	35.4	y	0.21	7	33.12	y	0.12	5.33	43.41	n	0.09	5.73	61.38	n	0.0298575	-5.65685	down	ENSG00000167106.11	FAM102A	chr9	protein_coding	family with sequence similarity 102, member A
novel_IR_9079	chr9	134029115	134034512	+	IntronR	ENST00000605164.1	novel	5.12	26.48	5.17	y	4.34	18.94	4.36	y	9.71	30.81	3.17	y	11.06	40.17	3.63	y	0.032636	7.25403	up	ENSG00000235106.8	LINC00094	chr9	antisense	long intergenic non-protein coding RNA 94
novel_IR_9178	chr9	137574843	137576080	-	IntronR	ENST00000277540.6	novel	0.06	2.38	41.35	n	0.1	4.94	50.31	n	0.36	13.26	37.27	y	0.31	12.17	39.37	y	0.0176142	7.96486	up	ENSG00000148399.11	DPH7	chr9	protein_coding	diphthamide biosynthesis 7
novel_IR_9348	chrX	119837916	119837921	-	IntronR	ENST00000619445.1	novel	0.58	34	58.79	n	0.64	28	44.09	n	0.97	46	47.34	y	1.01	59.25	58.5	y	0.0139771	10.5393	up	ENSG00000125351.10	UPF3B	chrX	protein_coding	UPF3 regulator of nonsense transcripts homolog B (yeast)
novel_IR_9365	chrX	136215013	136219398	-	IntronR	ENST00000370661.5	novel	2.42	3.1	1.28	n	2.81	3.25	1.16	n	1.3	5.71	4.38	y	0.86	3.38	3.91	n	0.0358409	-5.22142	down	ENSG00000129680.15	MAP7D3	chrX	protein_coding	MAP7 domain containing 3
novel_IR_9443	chrX	18897333	18899173	-	IntronR	ENST00000379942.4	novel	0.18	2.62	14.43	n	0.2	1.05	5.15	y	0.44	3.67	8.28	n	0.4	3.78	9.49	n	0.0239816	10.2859	up	ENSG00000044446.11	PHKA2	chrX	protein_coding	phosphorylase kinase, alpha 2 (liver)
novel_IR_9478	chrX	48512852	48514127	+	IntronR	ENST00000326194.10	novel	0.04	0.35	9.27	n	0	0	15.36	n	0.21	3.09	14.91	y	0.24	1.92	8.12	n	0.0180874	8.2	up	ENSG00000102312.20	PORCN	chrX	protein_coding	porcupine homolog (Drosophila)
